# Supplementary material for: PAMAM-calix-dendrimers: Synthesis and Thiacalixarene Conformation Effect on DNA Binding
Source: MDPI journal article supplement (doi:10.3390/ijms222111901), 2021-11-02
Supplement: s1 [file s1]

# PAMAM-calix-dendrimers: Synthesis and Thiocalixarene Conformation Effect on DNA Binding

Olga Mostovaya <sup>1</sup>, Pavel Padnya <sup>1,\*</sup>, Igor Shiabiev <sup>1</sup>, Timur Mukhametzyanov <sup>1</sup> and Ivan Stoikov <sup>1,\*</sup>

|                                                           |    |
|-----------------------------------------------------------|----|
| 1. NMR, IR and mass spectra of synthesized compounds..... | 2  |
| 2. Complexation investigation.....                        | 14 |
| 2.1 UV-Vis spectra.....                                   | 14 |
| 2.2 Fluorescence spectra.....                             | 20 |
| 2.3 CD spectra.....                                       | 24 |
| 2.4 DLS data.....                                         | 25 |
| 2.5 TEM images.....                                       | 36 |

## 1. NMR, IR and mass spectra of synthesized compounds

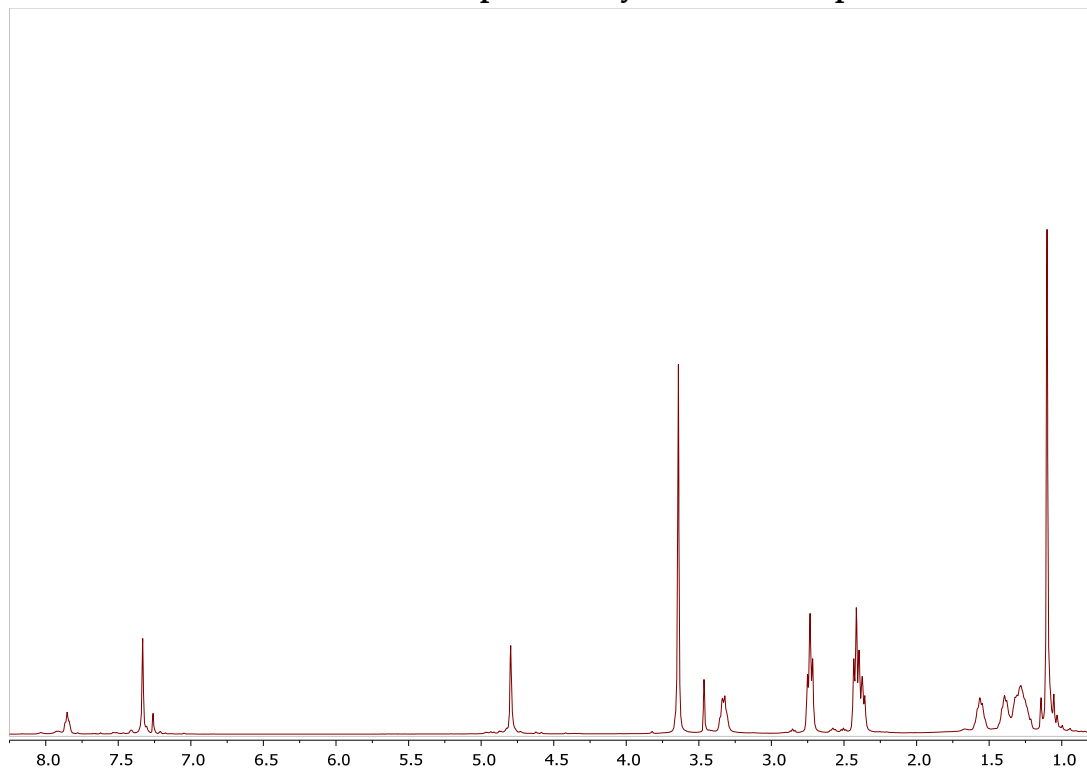

Fig. S1.  $^1\text{H}$  NMR spectrum of **G0.5-cone**,  $\text{CDCl}_3$ , 298 K, 400 MHz

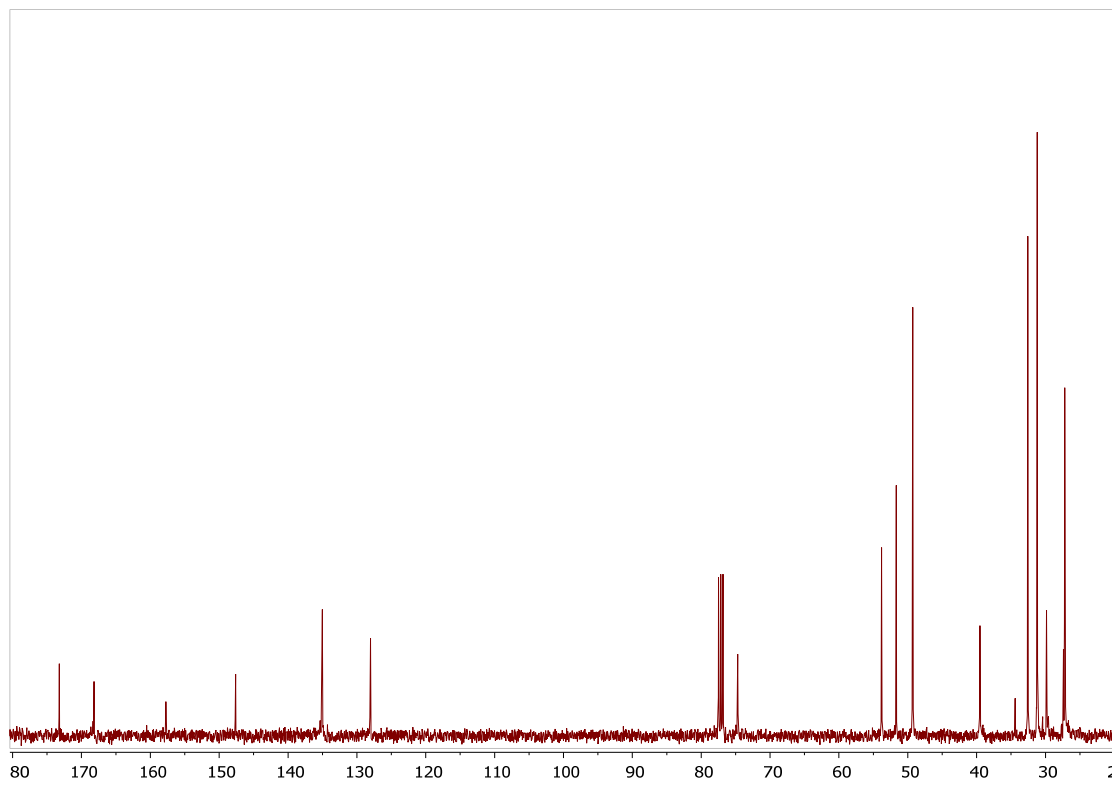

Fig. S2.  $^{13}\text{C}\{^1\text{H}\}$  NMR spectrum of **G0.5-cone**,  $\text{CDCl}_3$ , 298 K, 100 MHz

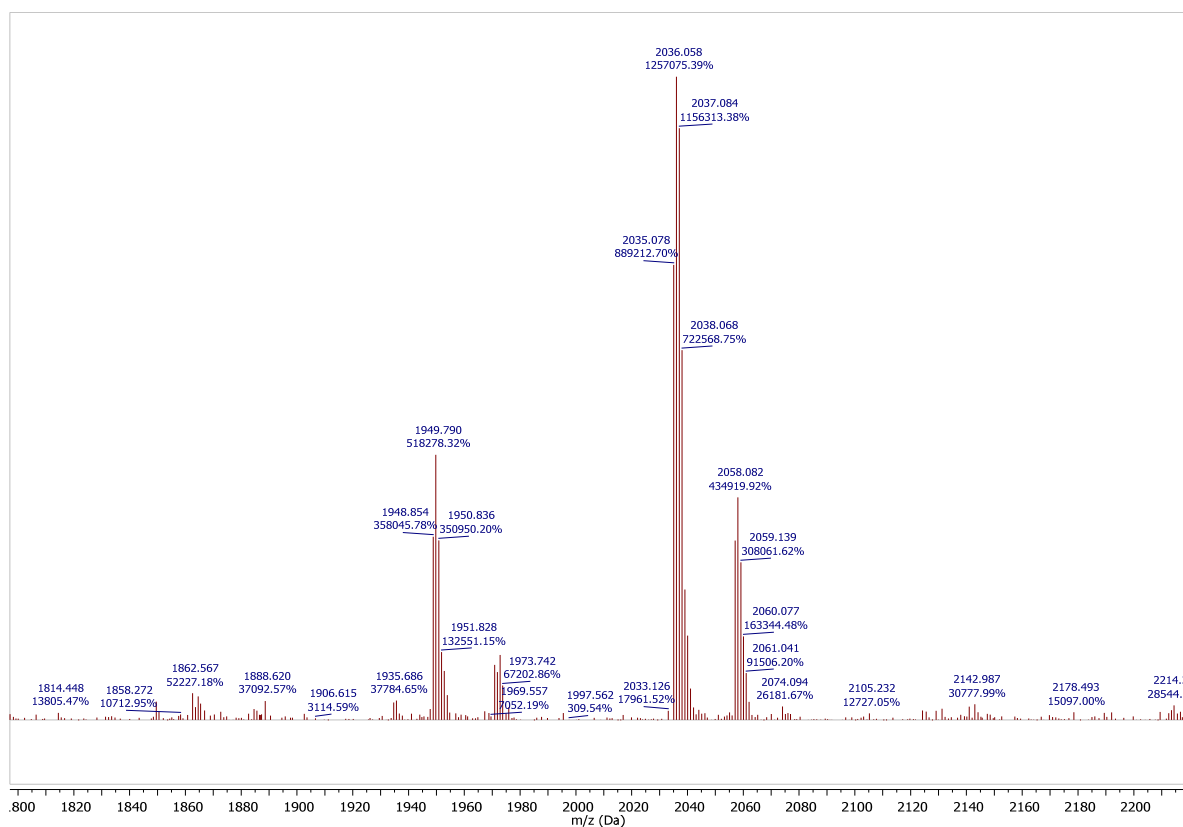

Fig. S3. Mass spectrum (MALDI TOF, 4-nitroaniline matrix) of G0.5-cone

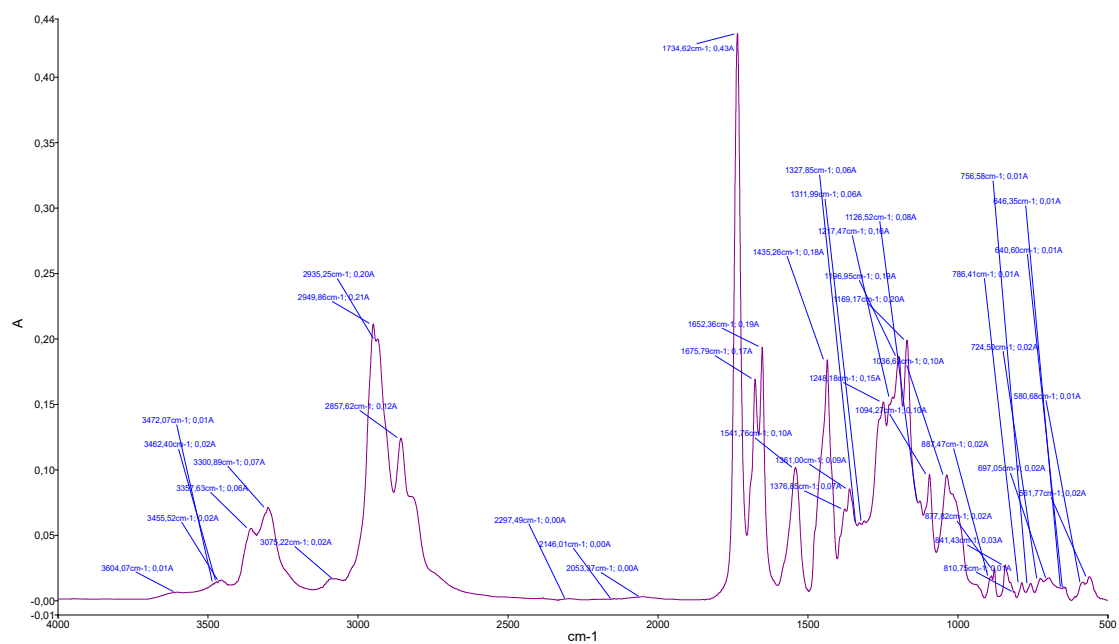

Fig. S4. FTIR-ATR spectrum of G0.5-cone

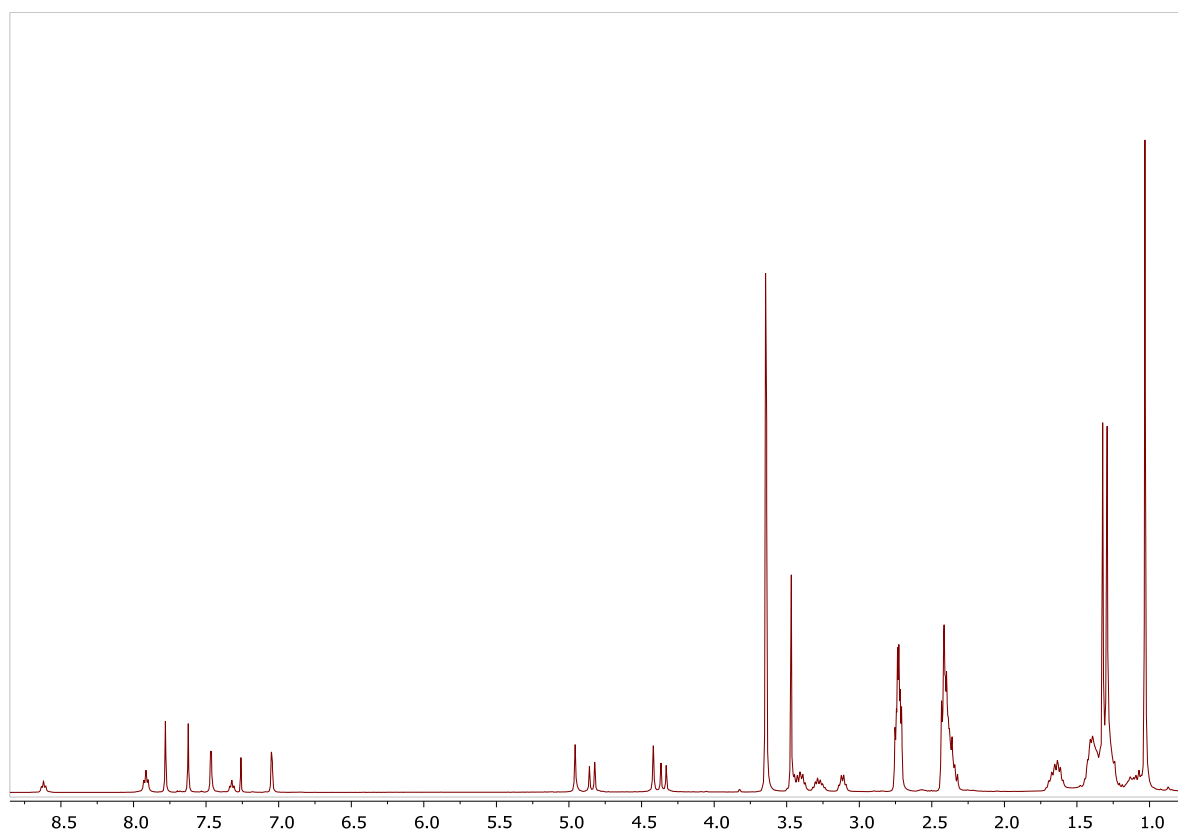

Fig. S5.  $^1\text{H}$  NMR spectrum of **G0.5-paco**,  $\text{CDCl}_3$ , 298 K, 400 MHz

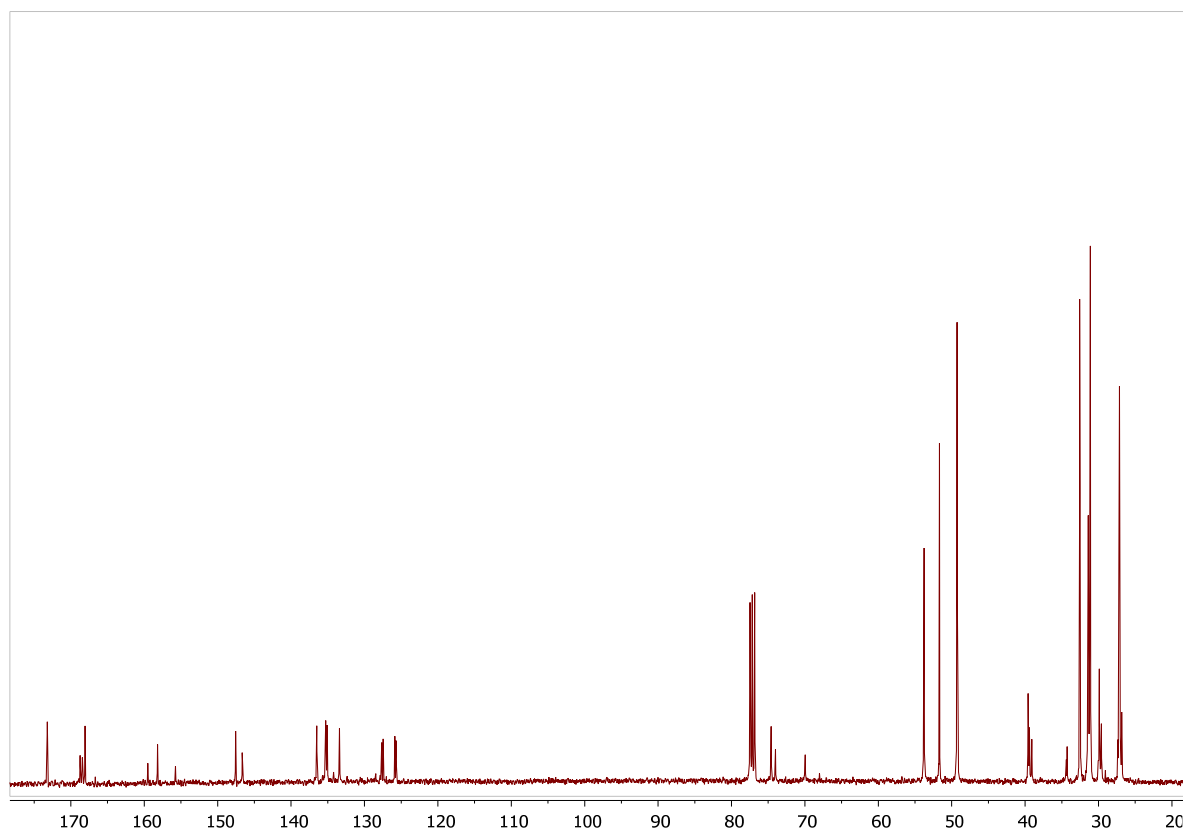

Fig. S6.  $^{13}\text{C}\{^1\text{H}\}$  NMR spectrum of **G0.5-paco**,  $\text{CDCl}_3$ , 298 K, 100 MHz

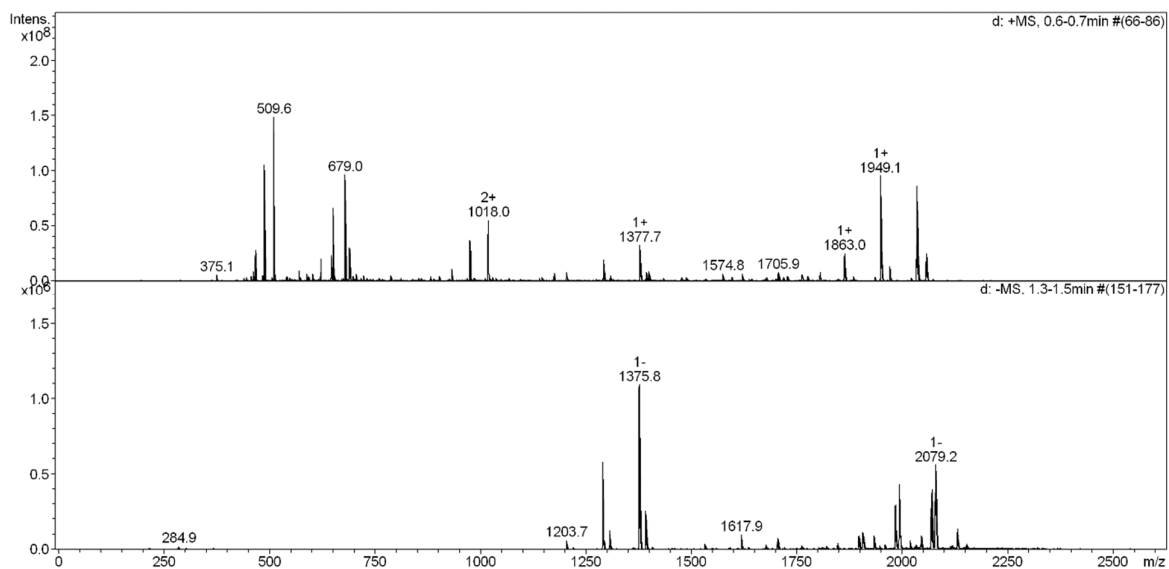

Fig. S7. Mass spectrum (ESI) of G0.5-paco

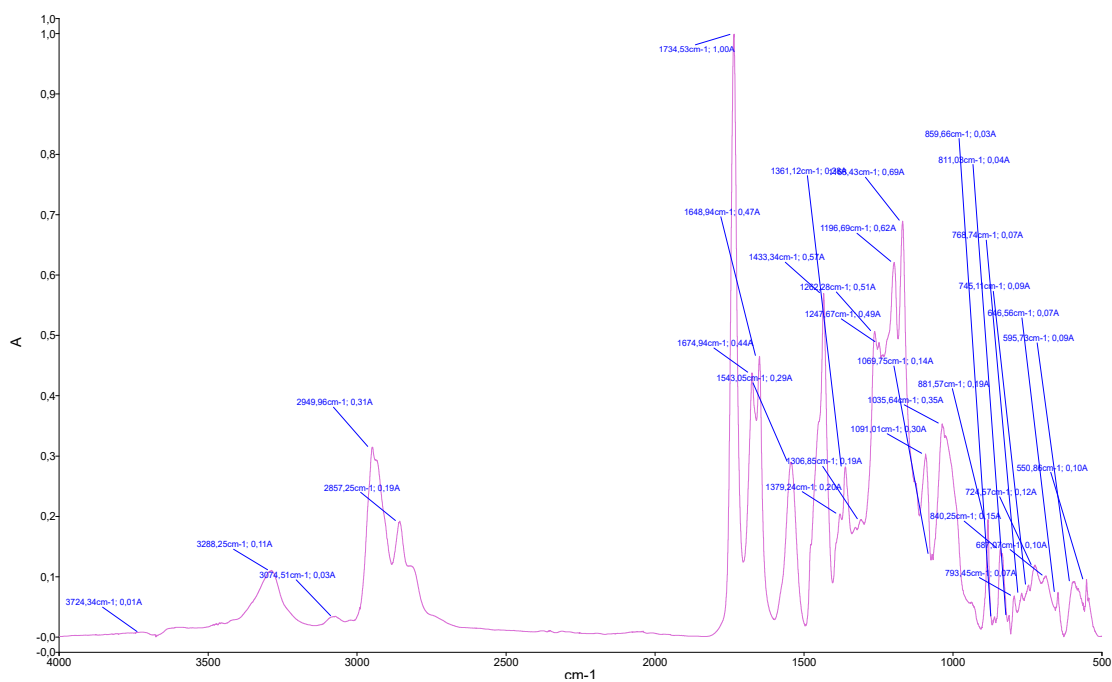

Fig. S8. FTIR-ATR spectrum of G0.5-paco

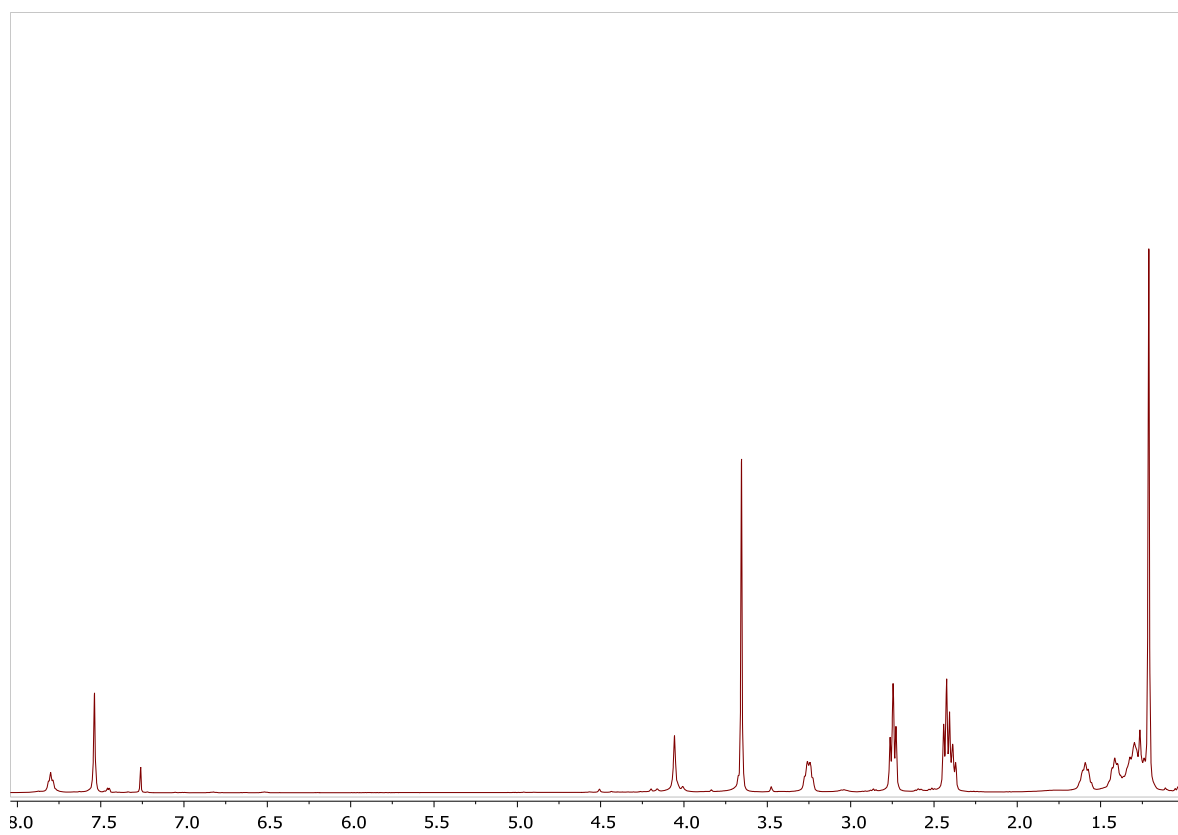

Fig. S9.  $^1\text{H}$  NMR spectrum of **G0.5-alt**,  $\text{CDCl}_3$ , 298 K, 400 MHz

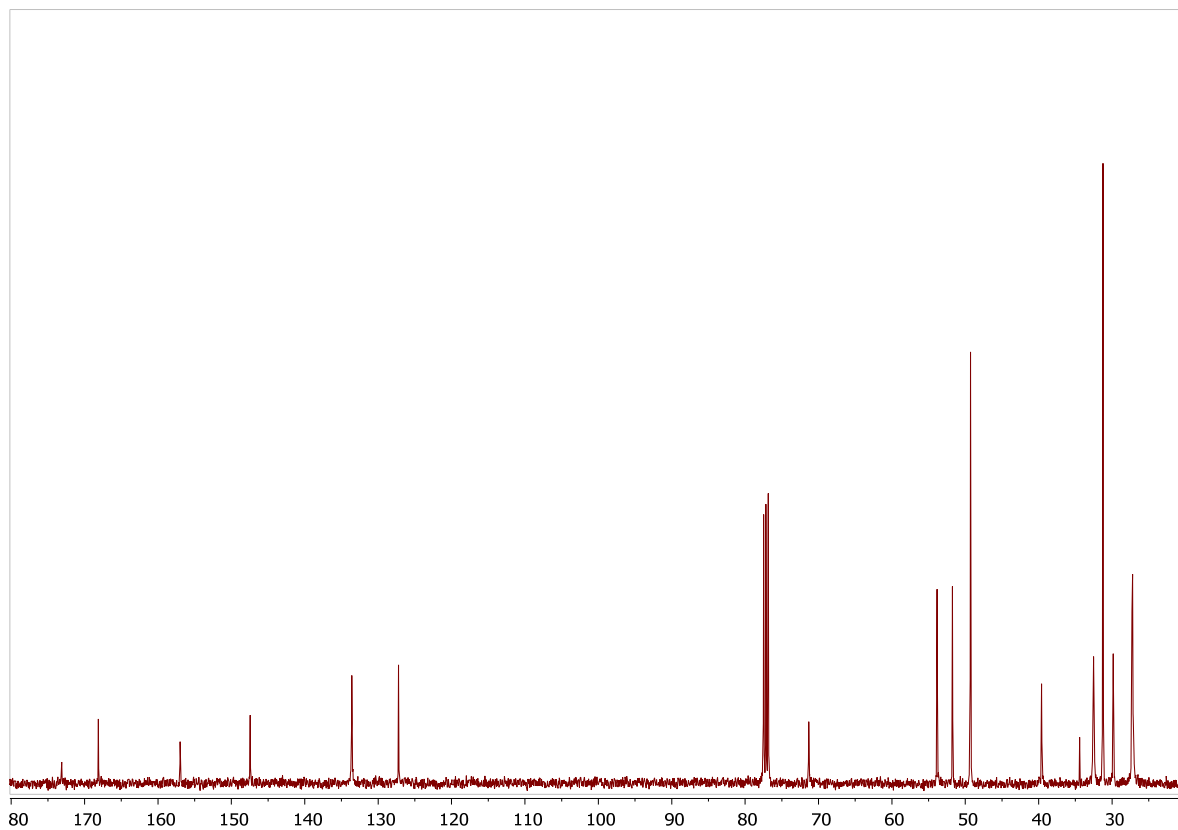

Fig. S10.  $^{13}\text{C}\{^1\text{H}\}$  NMR spectrum of **G0.5-alt**,  $\text{CDCl}_3$ , 298 K, 100 MHz



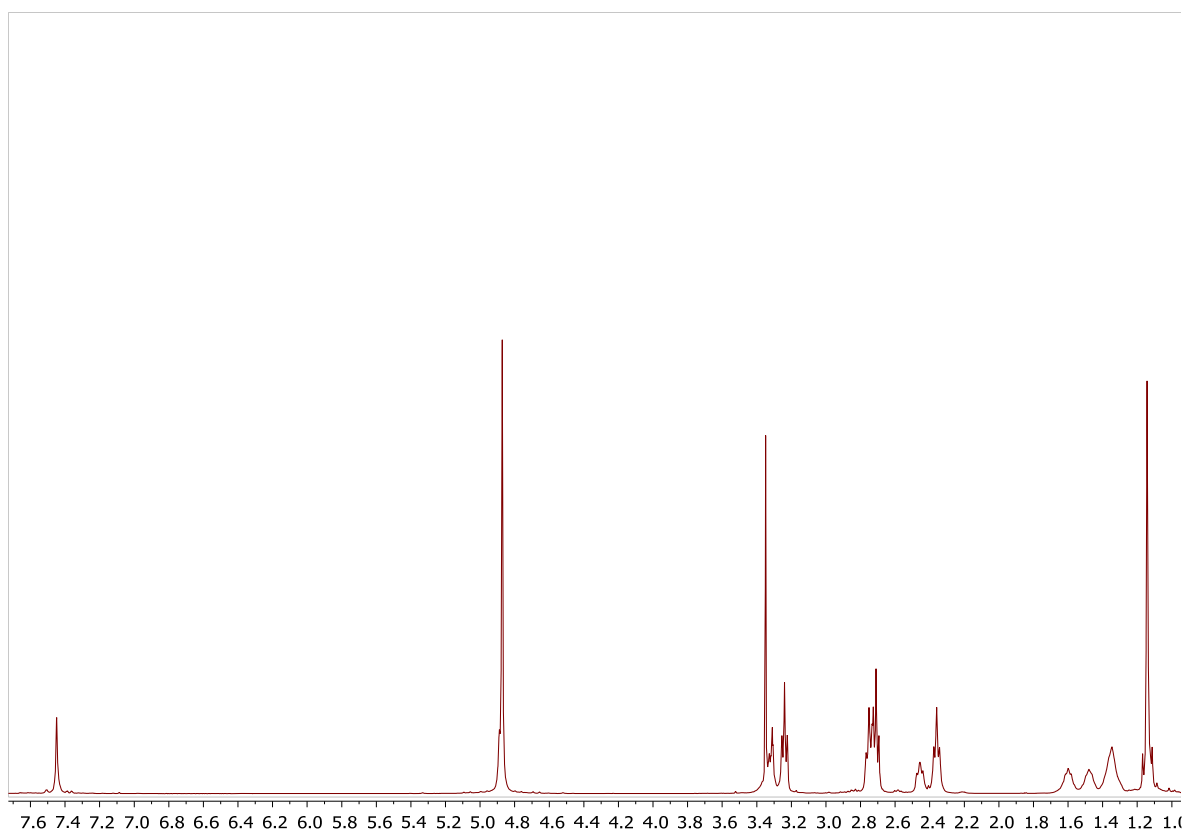

Fig. S13.  $^1\text{H}$  NMR spectrum of **G1-cone**,  $\text{CD}_3\text{OD}$ , 298 K, 400 MHz

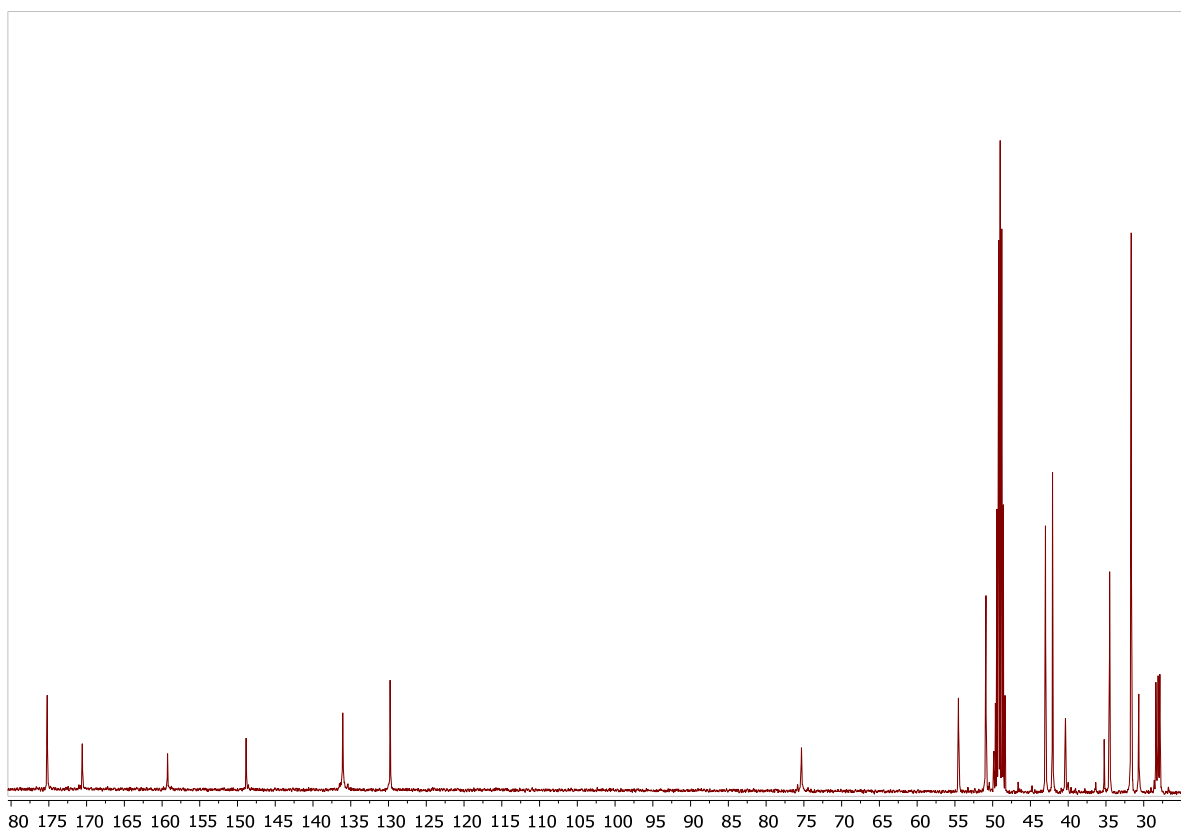

Fig. S14.  $^{13}\text{C}\{^1\text{H}\}$  NMR spectrum of **G1-cone**,  $\text{CD}_3\text{OD}$ , 298 K, 100 MHz



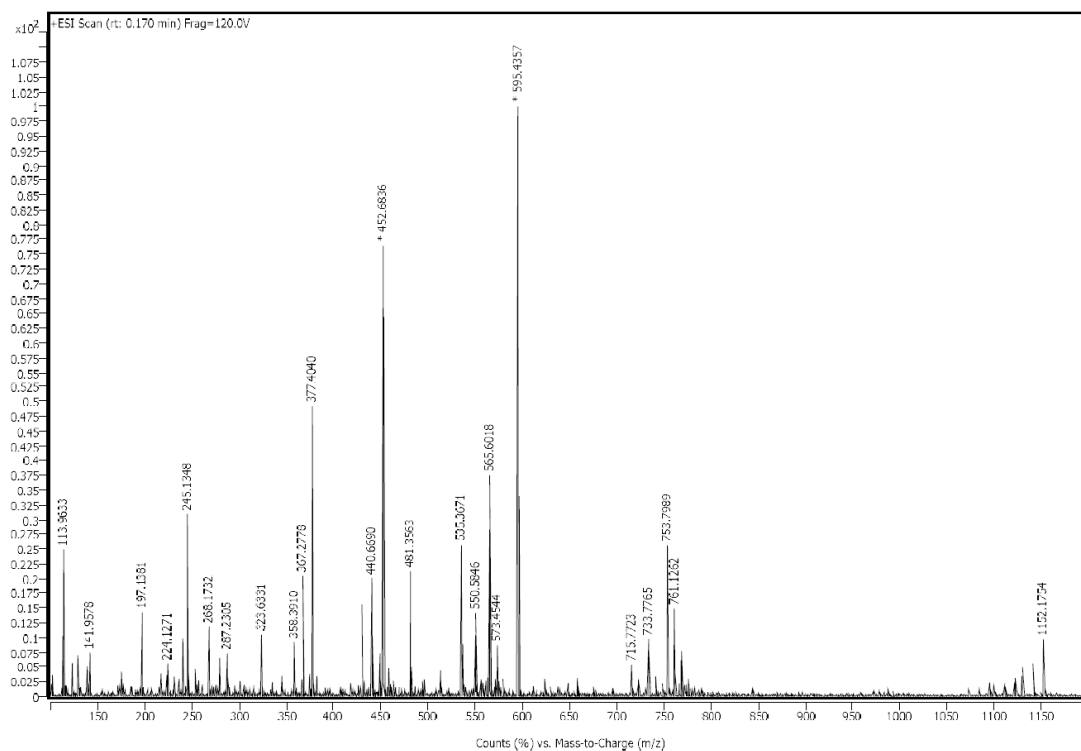

Fig. S15. Mass spectrum (HRESI) of G1-cone

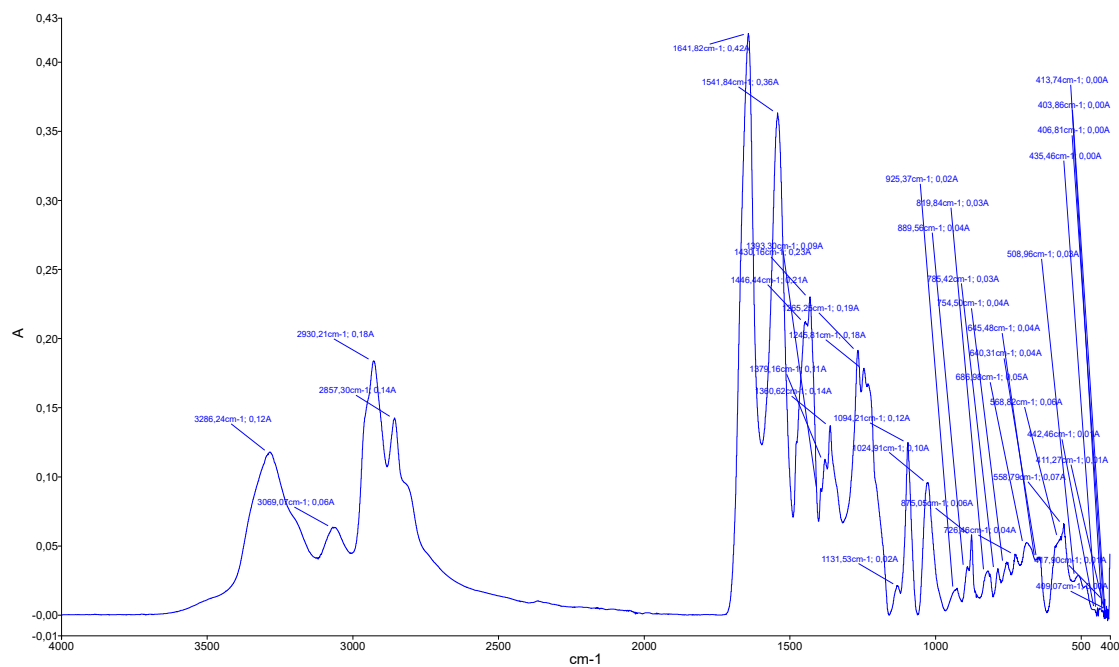

Fig. S16. FTIR-ATR spectrum of G1-cone

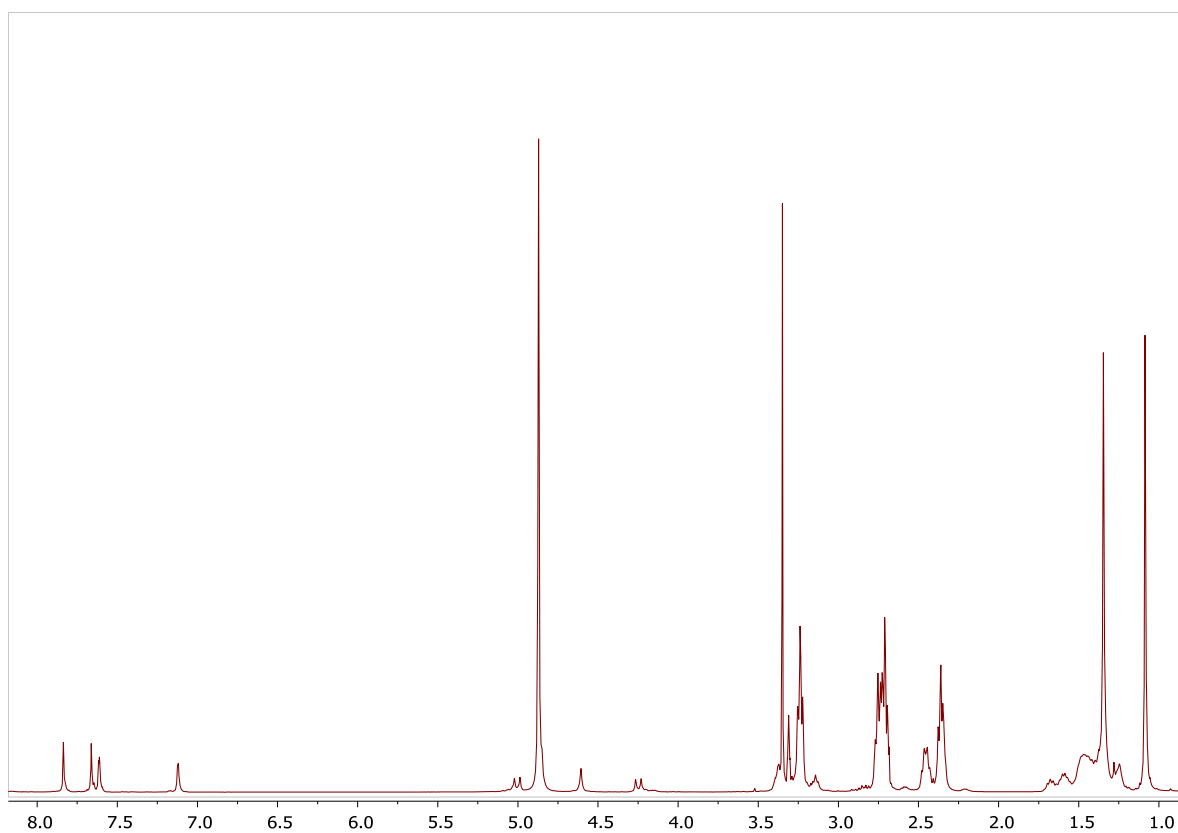

Fig. S17.  $^1\text{H}$  NMR spectrum of **G1-paco**,  $\text{CD}_3\text{OD}$ , 298 K, 400 MHz

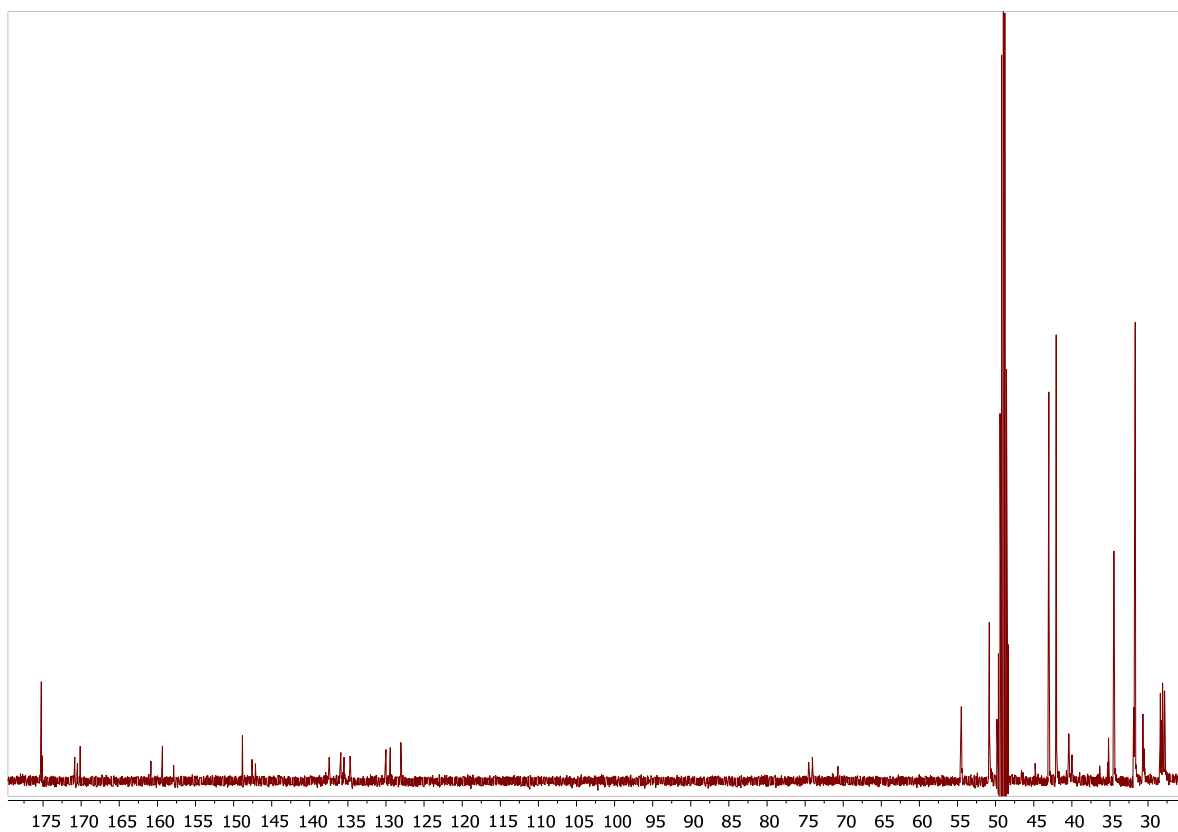

Fig. S18.  $^{13}\text{C}\{^1\text{H}\}$  NMR spectrum of **G1-paco**,  $\text{CD}_3\text{OD}$ , 298 K, 100 MHz

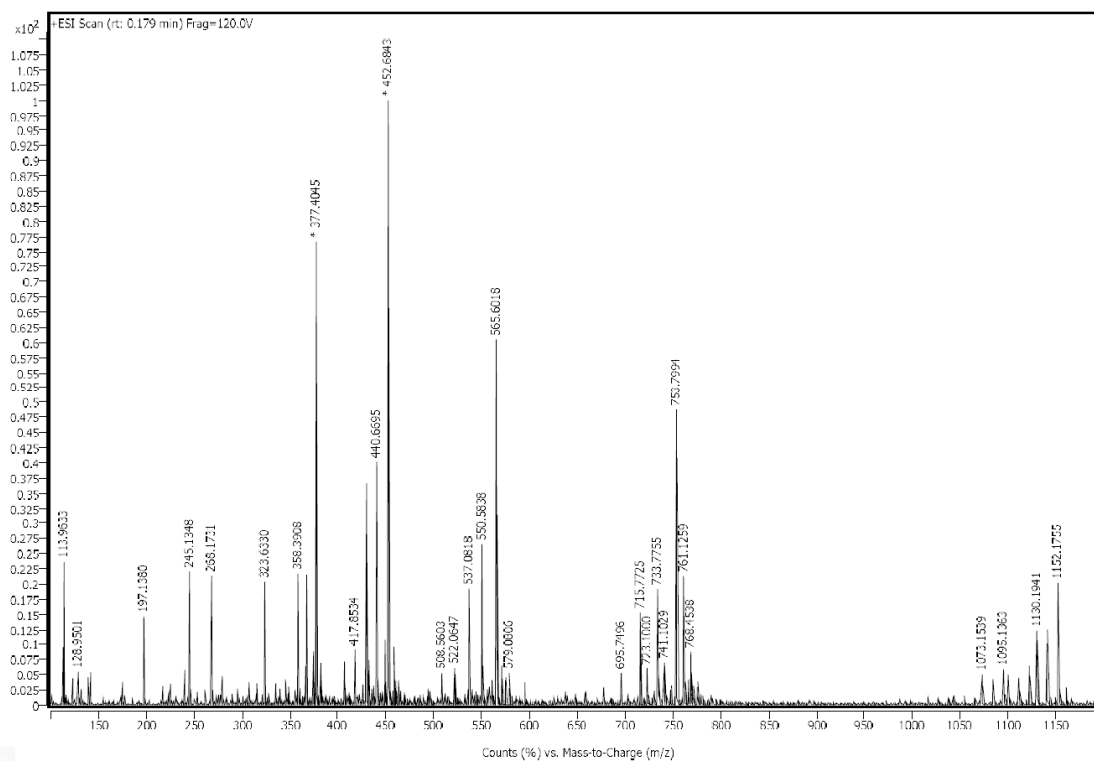

Fig. S19. Mass spectrum (HRESI) of G1-paco

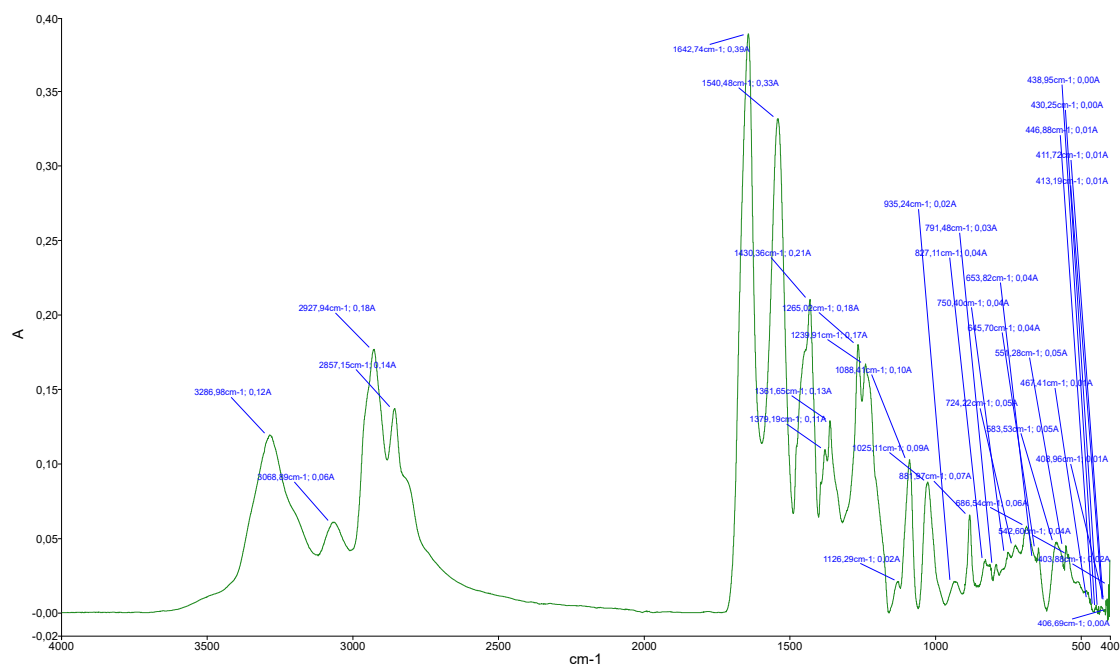

Fig. S20. FTIR-ATR spectrum of G1-paco

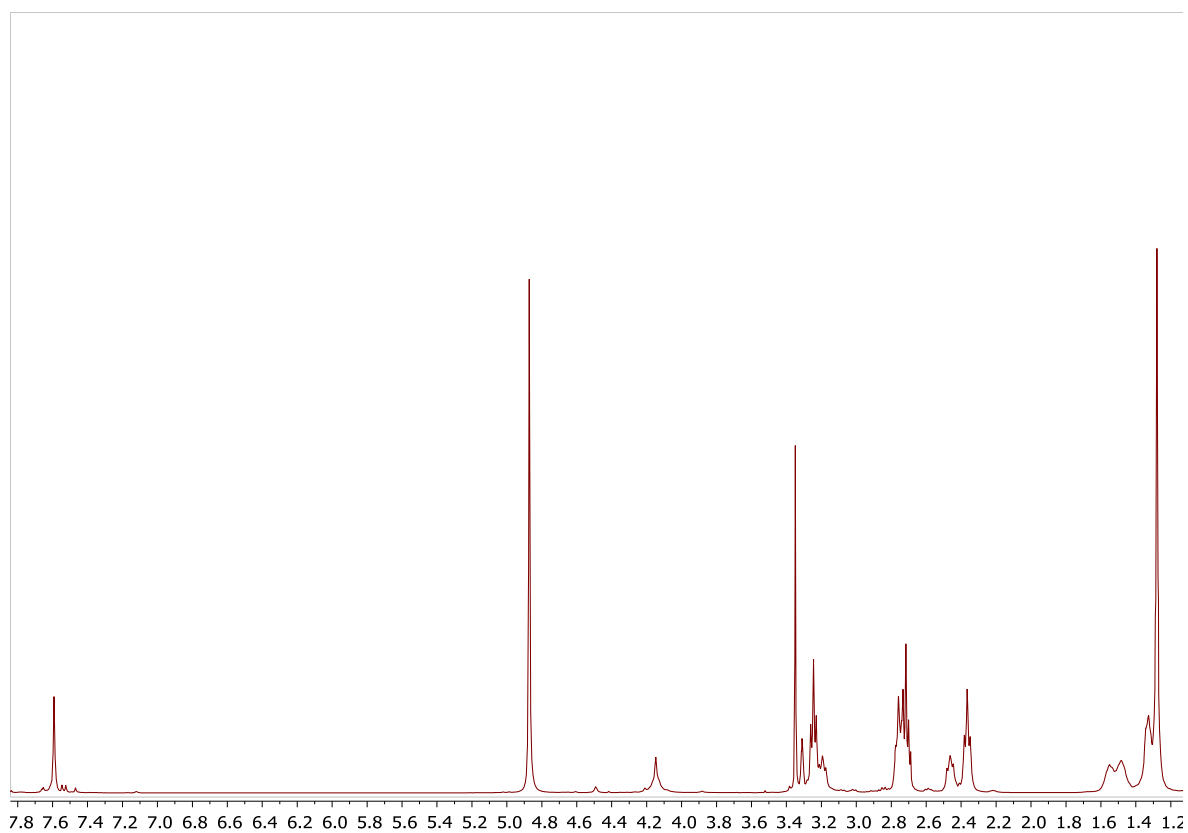

Fig. S21.  $^1\text{H}$  NMR spectrum of **G1-1,3-alt**,  $\text{CD}_3\text{OD}$ , 298 K, 400 MHz

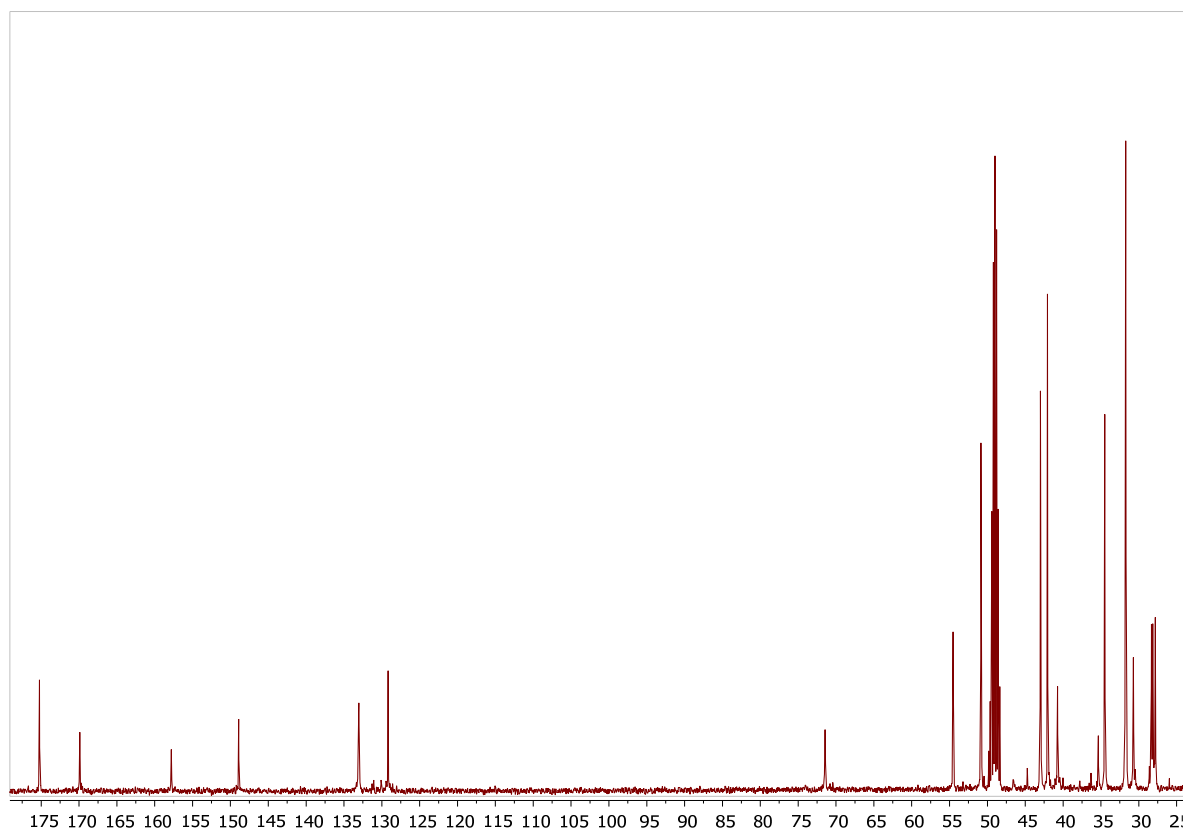

Fig. S22.  $^{13}\text{C}\{^1\text{H}\}$  NMR spectrum of **G1-1,3-alt**,  $\text{CD}_3\text{OD}$ , 298 K, 100 MHz

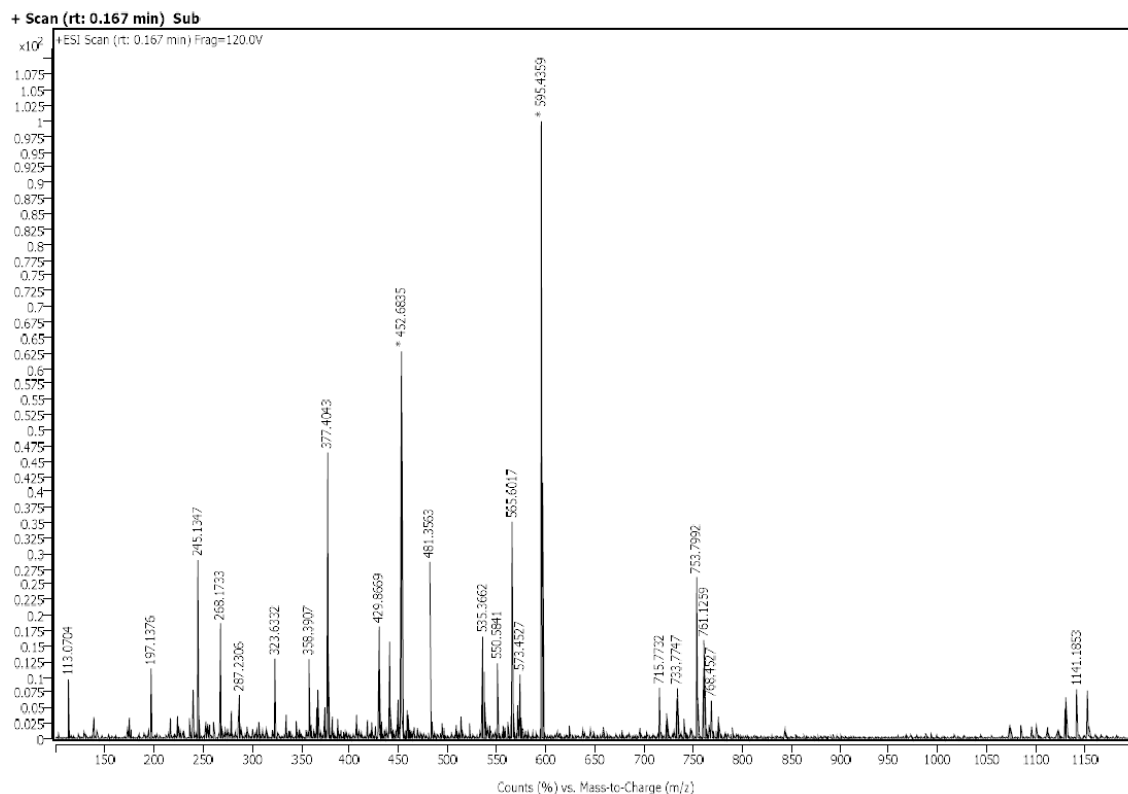

Fig. S23. Mass spectrum (HRESI) of G1-1,3-alt

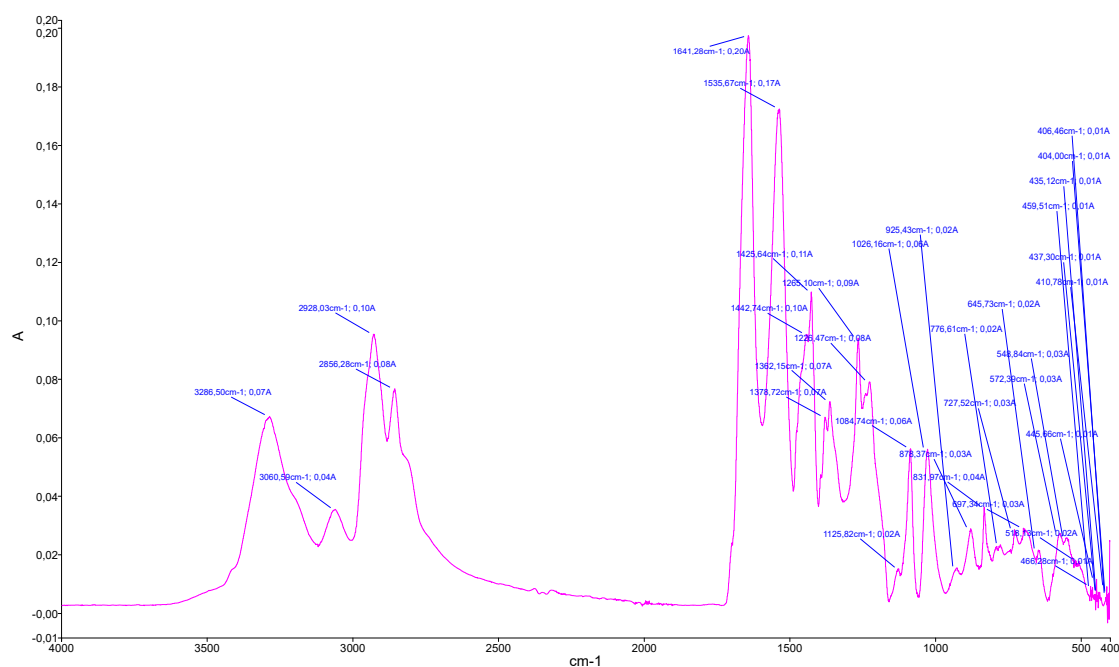

Fig. S24. FTIR-ATR spectrum of G1-1,3-alt

## 2. Complexation investigation

### 2.1. UV-Vis spectra

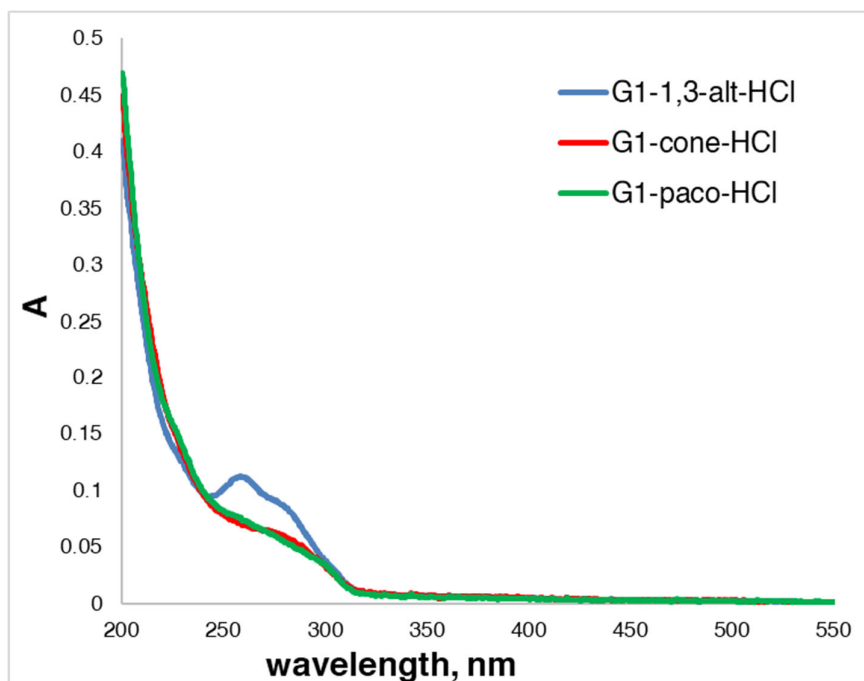

Fig. S25. UV-Vis absorption spectra of **G1-HCl** compounds (3.33  $\mu\text{M}$ ) in different conformations, in 10 mM Tris-HCl, pH 7.4.

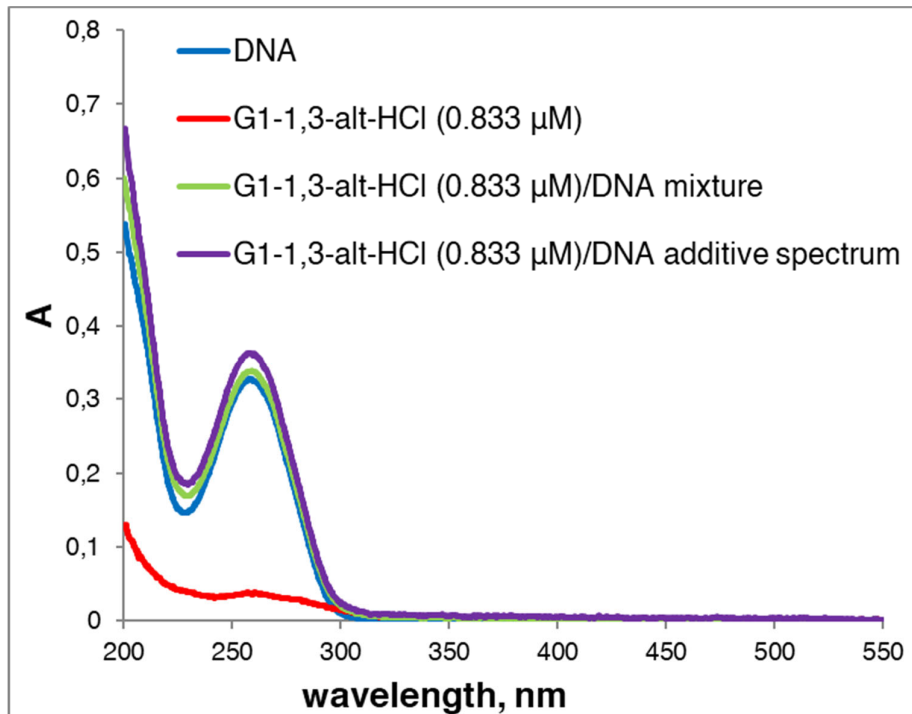

Fig. S26. UV-Vis absorption spectra of DNA ( $1.855 \times 10^{-5}$  M base pairs), **G1-1,3-alt-HCl** (0.833  $\mu\text{M}$ ), and their mixture in 10 mM Tris-HCl, pH 7.4.

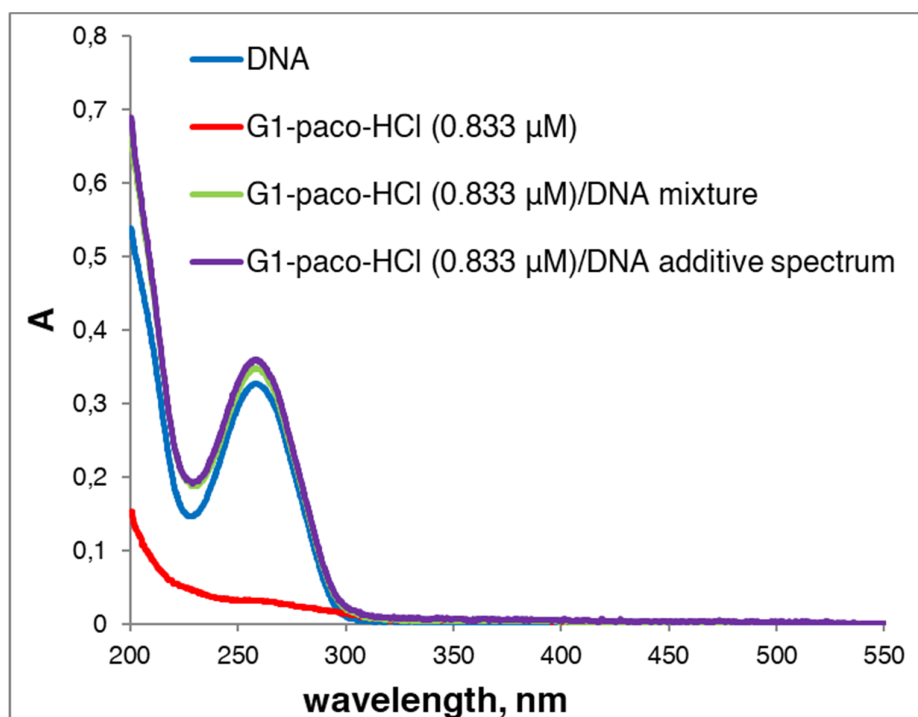

Fig. S27. UV-Vis absorption spectra of DNA ( $1.855 \times 10^{-5}$  M base pairs), **G1-paco-HCl** (0.833 μM), and their mixture in 10 mM Tris-HCl, pH 7.4.

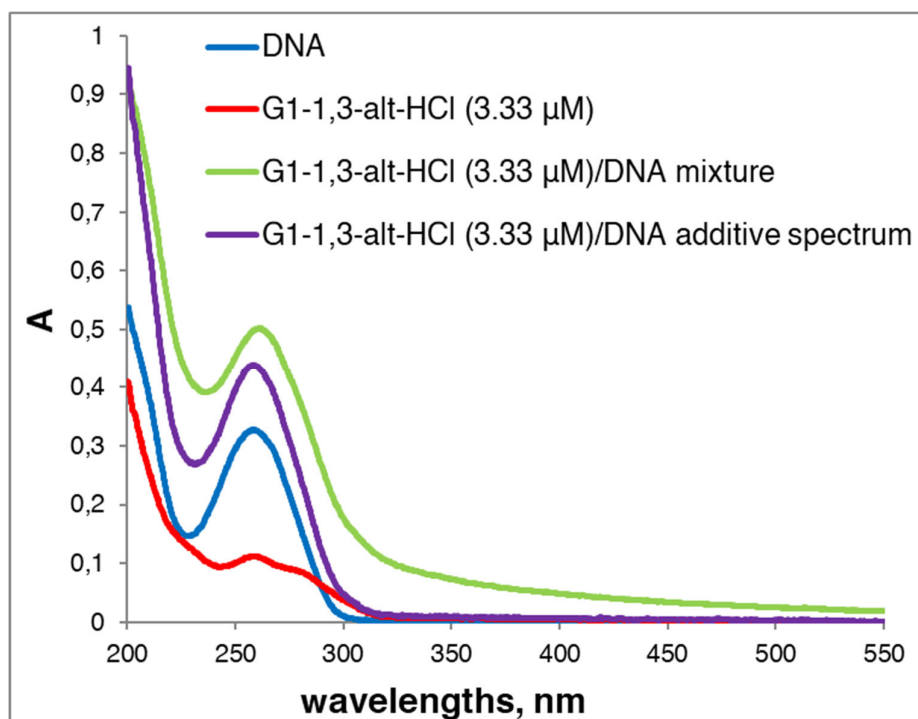

Fig. S28. UV-Vis absorption spectra of DNA ( $1.855 \times 10^{-5}$  M base pairs), **G1-1,3-alt-HCl** (3.33 μM), and their mixture in 10 mM Tris-HCl, pH 7.4.

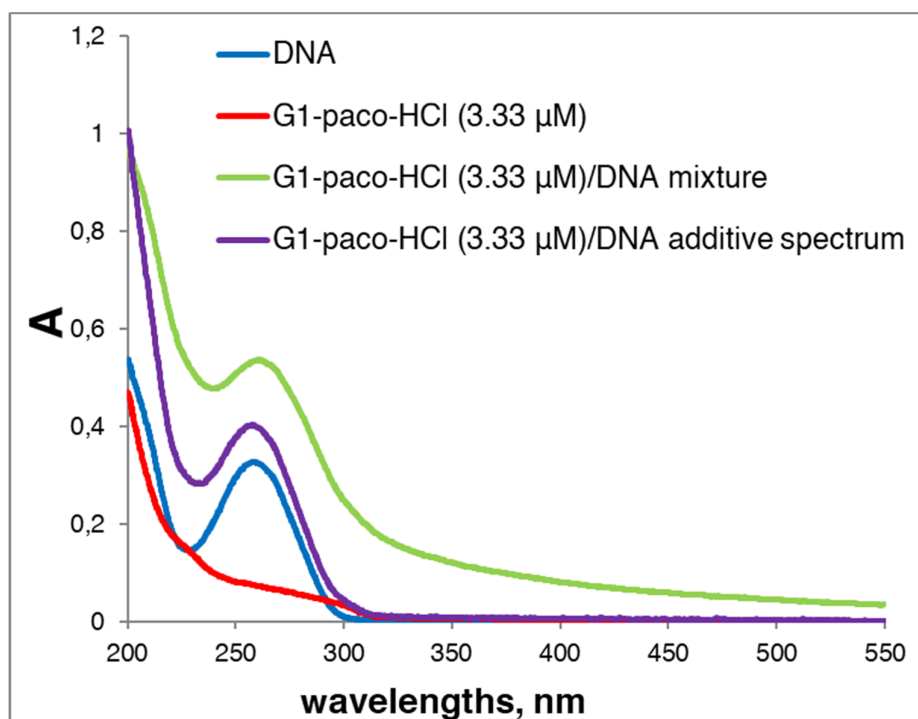

Fig. S29. UV-Vis absorption spectra of DNA ( $1.855 \times 10^{-5}$  M base pairs), **G1-paco-HCl** (3.33 μM), and their mixture in 10 mM Tris-HCl, pH 7.4.

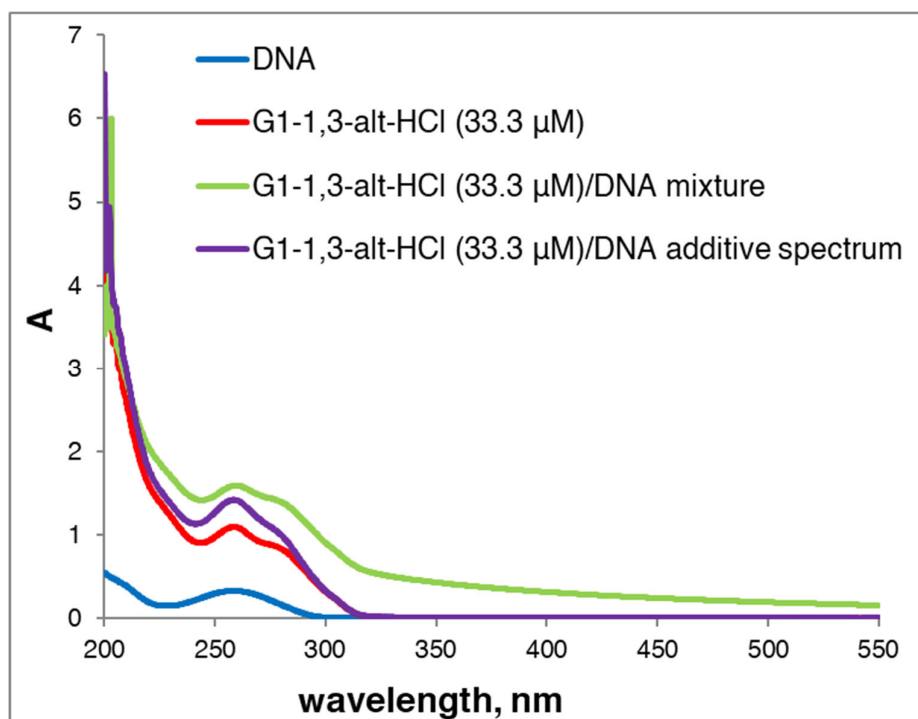

Fig. S30. UV-Vis absorption spectra of DNA ( $1.855 \times 10^{-5}$  M base pairs), **G1-1,3-alt-HCl** (33.3 μM), and their mixture in 10 mM Tris-HCl, pH 7.4.



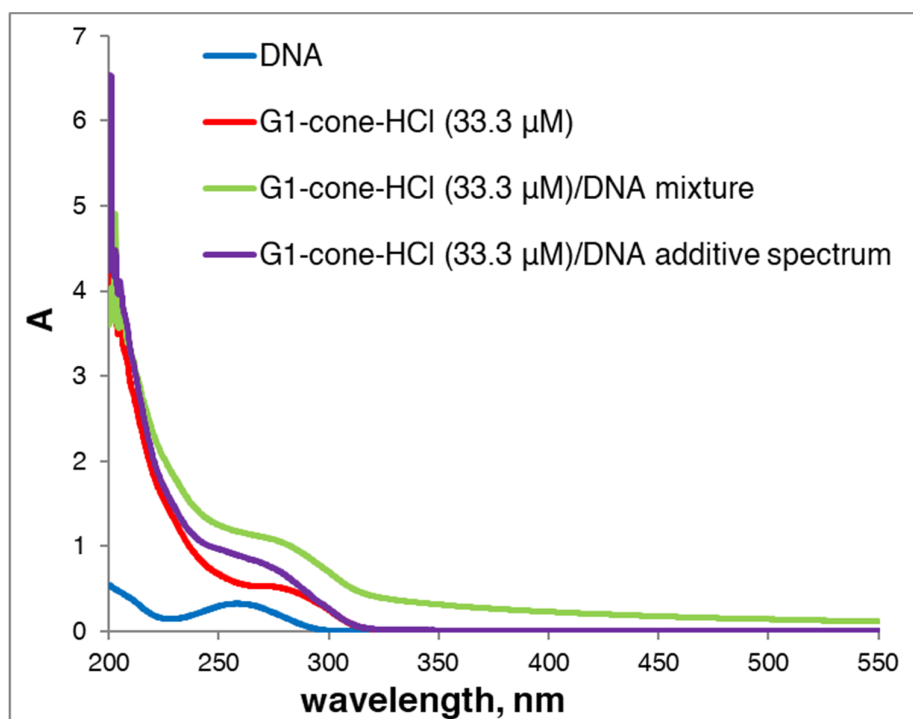

Fig. S31. UV-Vis absorption spectra of DNA ( $1.855 \times 10^{-5}$  M base pairs), **G1-cone-HCl** (33.3 μM), and their mixture in 10 mM Tris-HCl, pH 7.4.

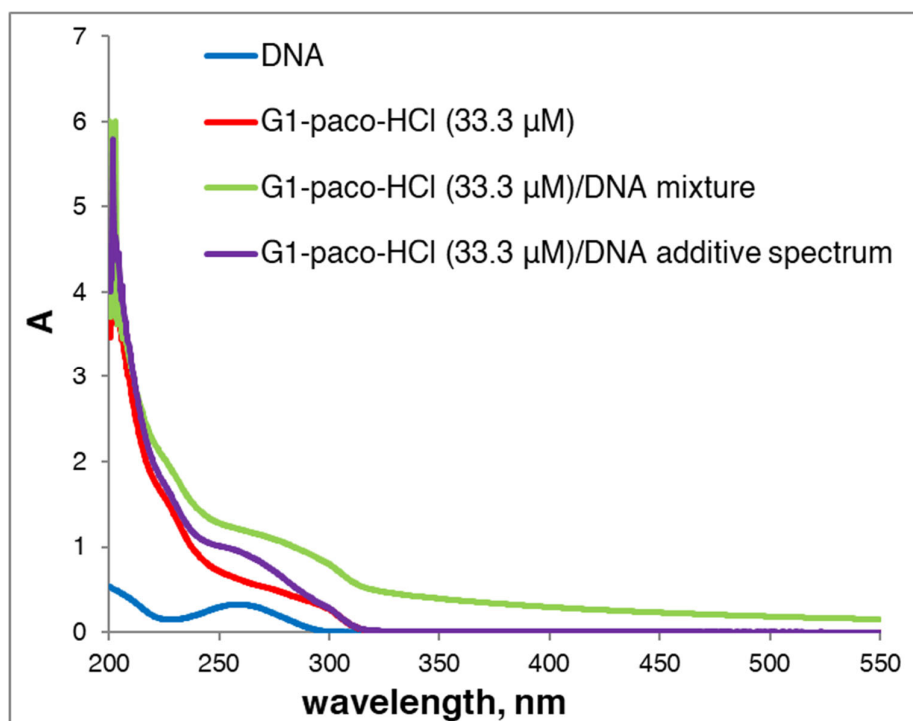

Fig. S32. UV-Vis absorption spectra of DNA ( $1.855 \times 10^{-5}$  M base pairs), **G1-paco-HCl** (33.3 μM), and their mixture in 10 mM Tris-HCl, pH 7.4.

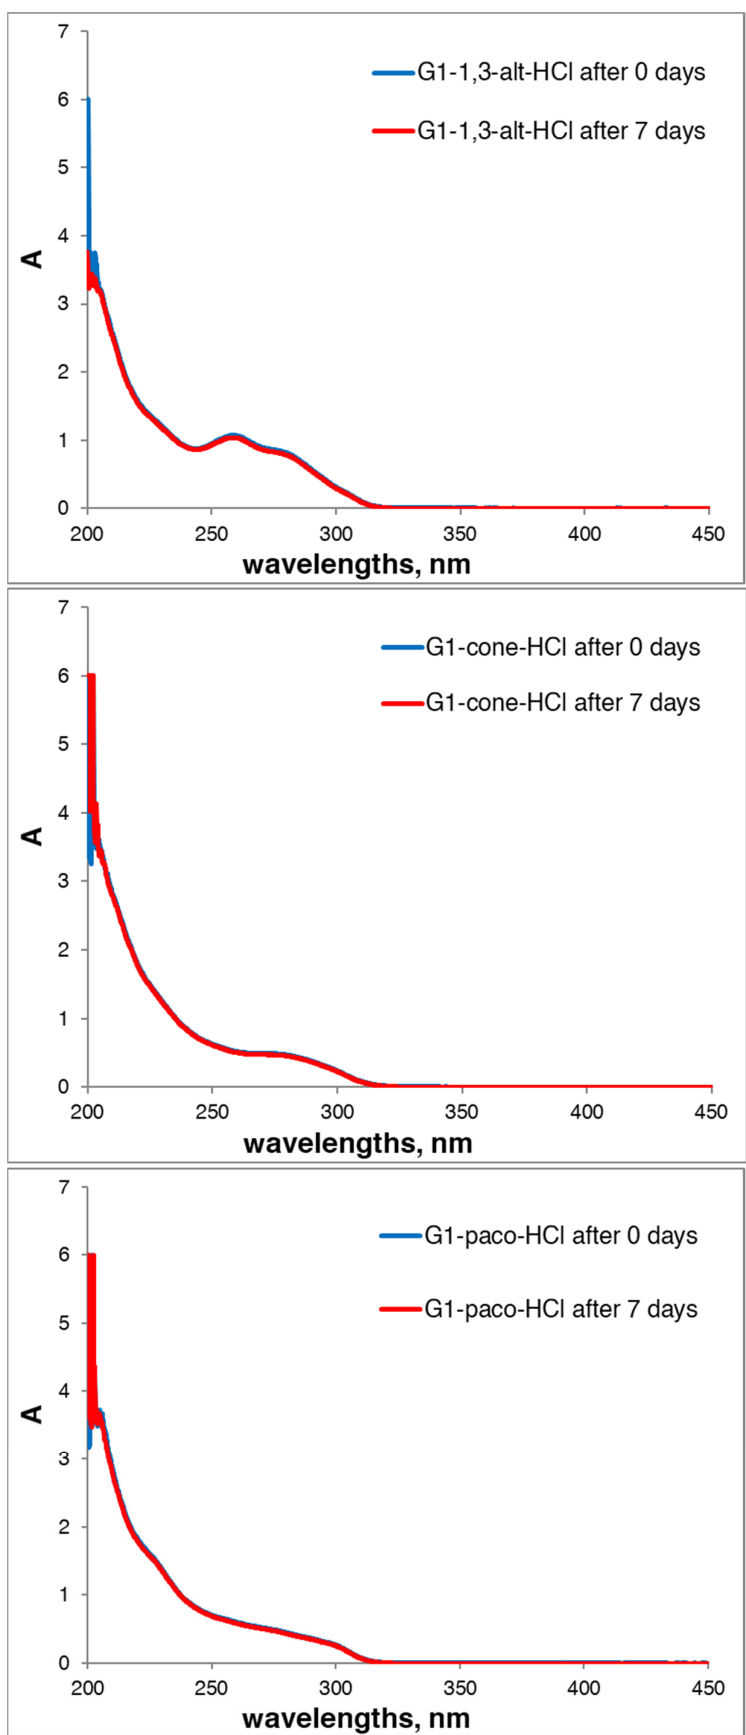

Fig. S33. UV-Vis spectra of compounds **G1-HCl** (33.3  $\mu\text{M}$ ) in different conformations in 10 mM Tris-HCl (pH 7.4) immediately and after 7 days' storage at room temperature.

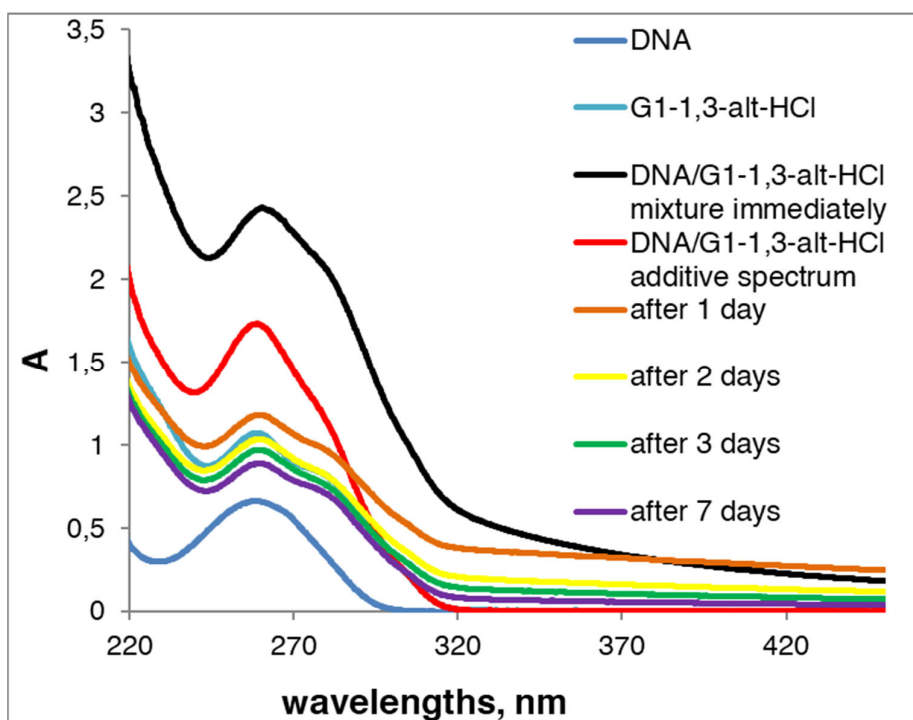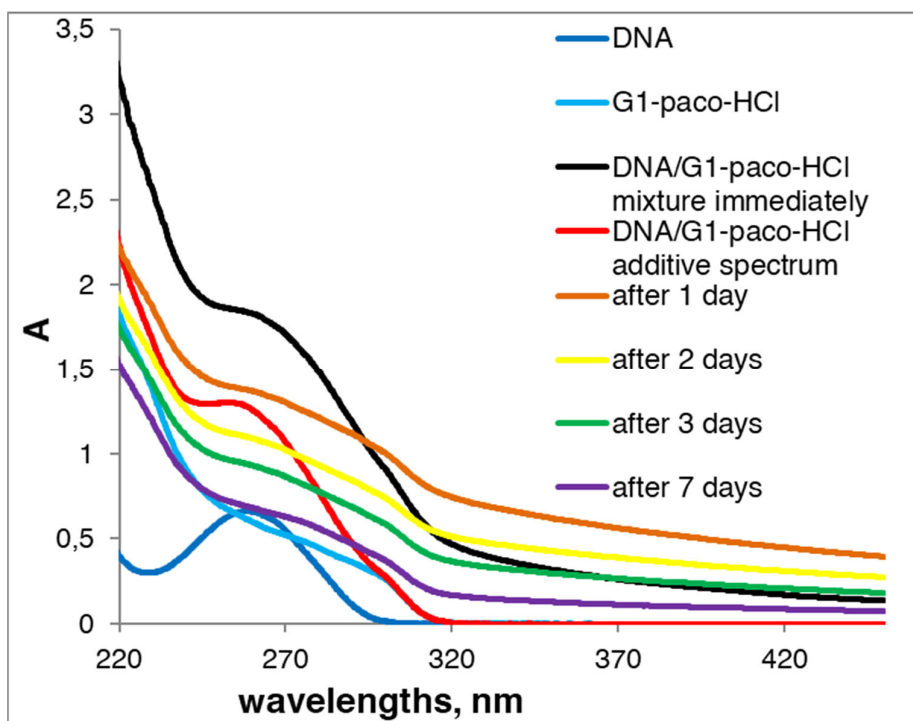

Fig. S34. UV-Vis spectra of compounds **G1-paco-HCl** and **G1-1,3-alt-HCl** (33.3  $\mu\text{M}$ ), DNA ( $3.710 \times 10^{-5}$  M base pairs) and their mixture (10 mM Tris-HCl, pH 7.4) after storage at room temperature.

## 2.2 Fluorescence spectra

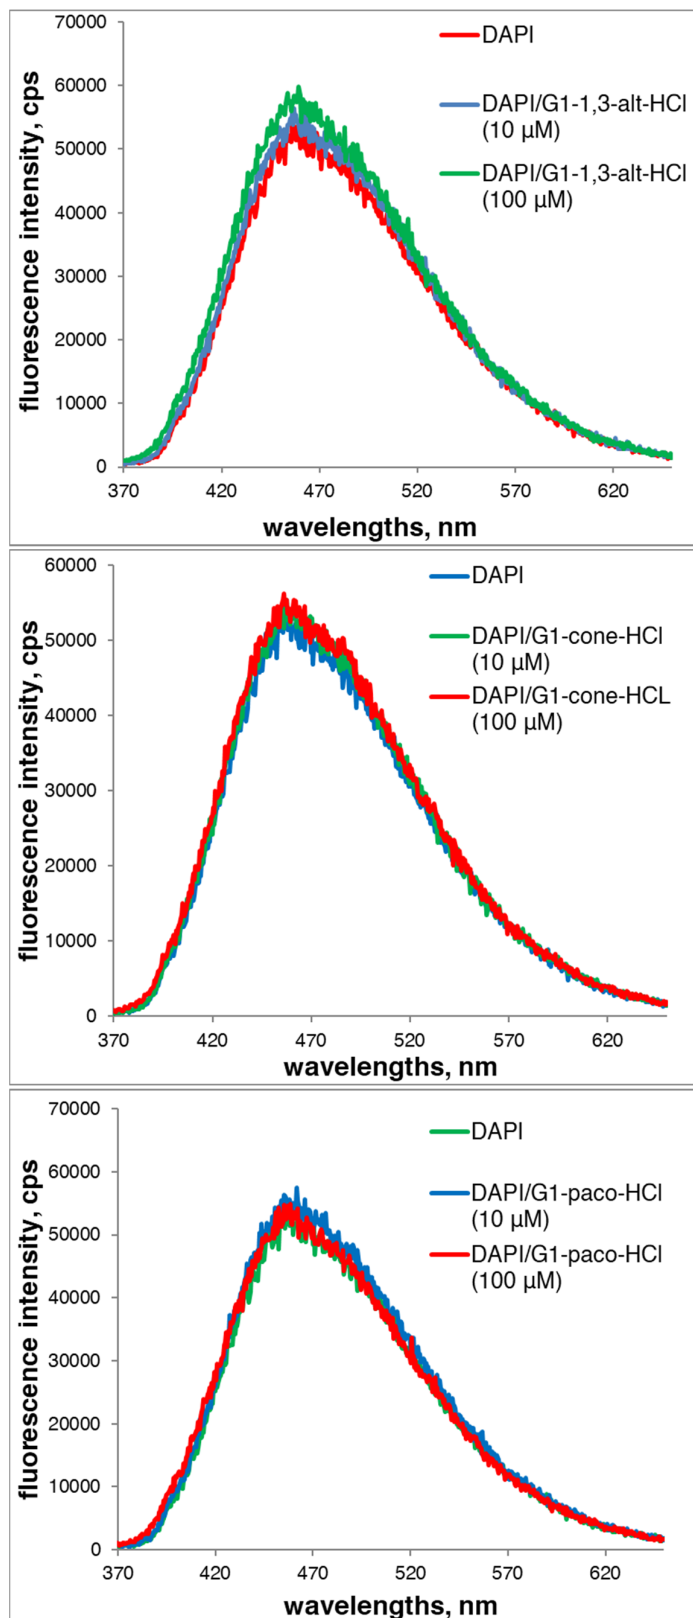

Fig. S35. Emission spectra of DAPI (10  $\mu$ M) in presence of different conformations **G1-HCl** (10 and 100  $\mu$ M) in 10 mM Tris-HCl, pH 7.4.

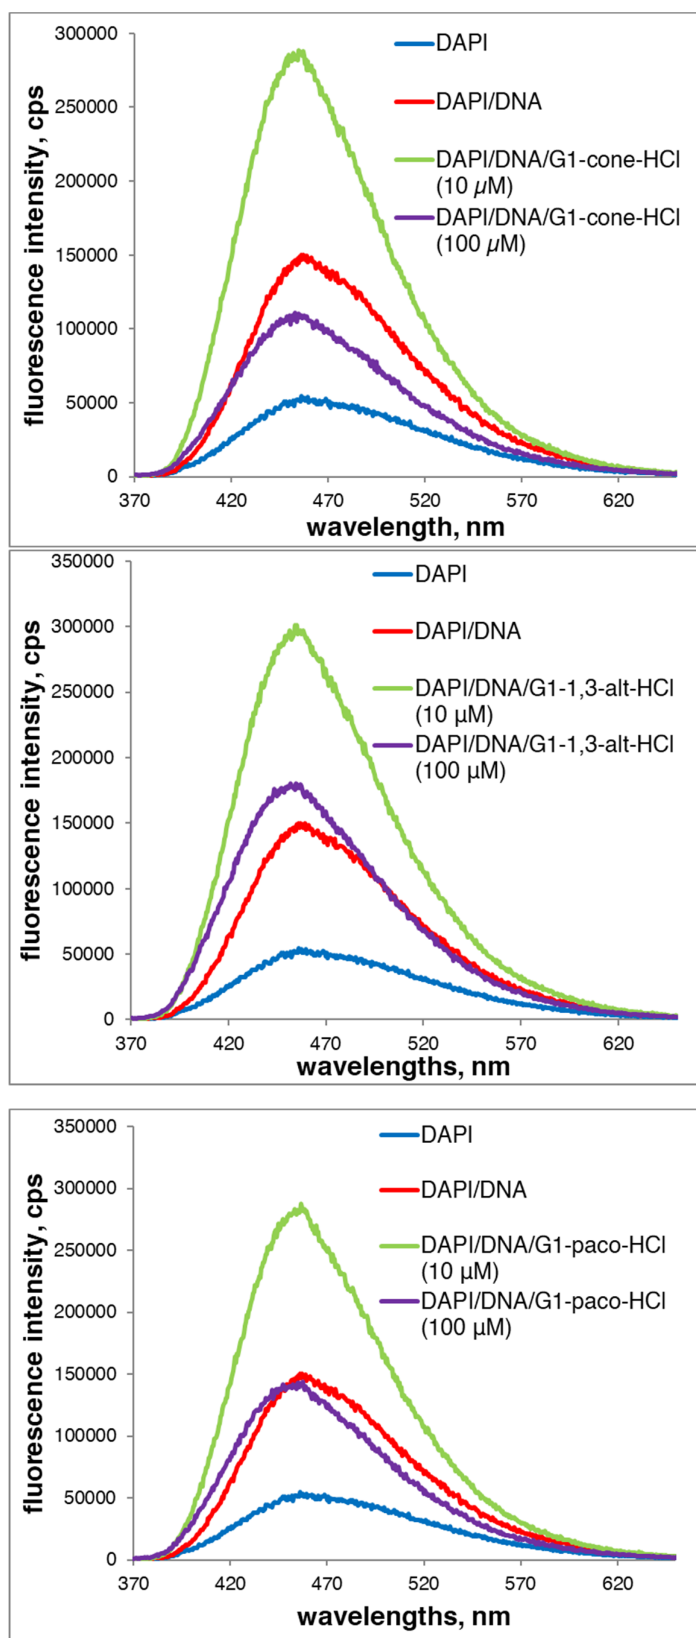

Fig. S36. Emission spectra of DAPI/DNA in presence of 10 and 100  $\mu\text{M}$  G1-HCl: DAPI added to DNA/dendrimer mixture.

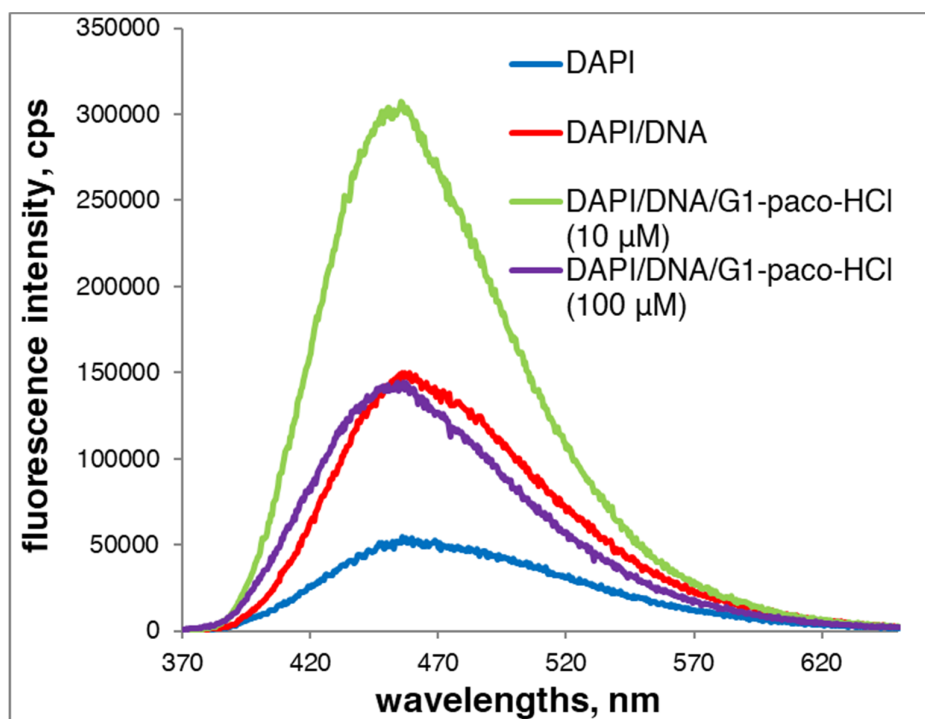

Fig. S37. Emission spectra of DAPI, DAPI/DNA and DAPI/DNA in the presence of 10  $\mu\text{M}$  and 100  $\mu\text{M}$  of **G1-paco-HCl**, in 10 mM Tris-HCl buffer, pH = 7.4: dendrimers added to DNA/DAPI mixture.

### 2.3. CD spectra

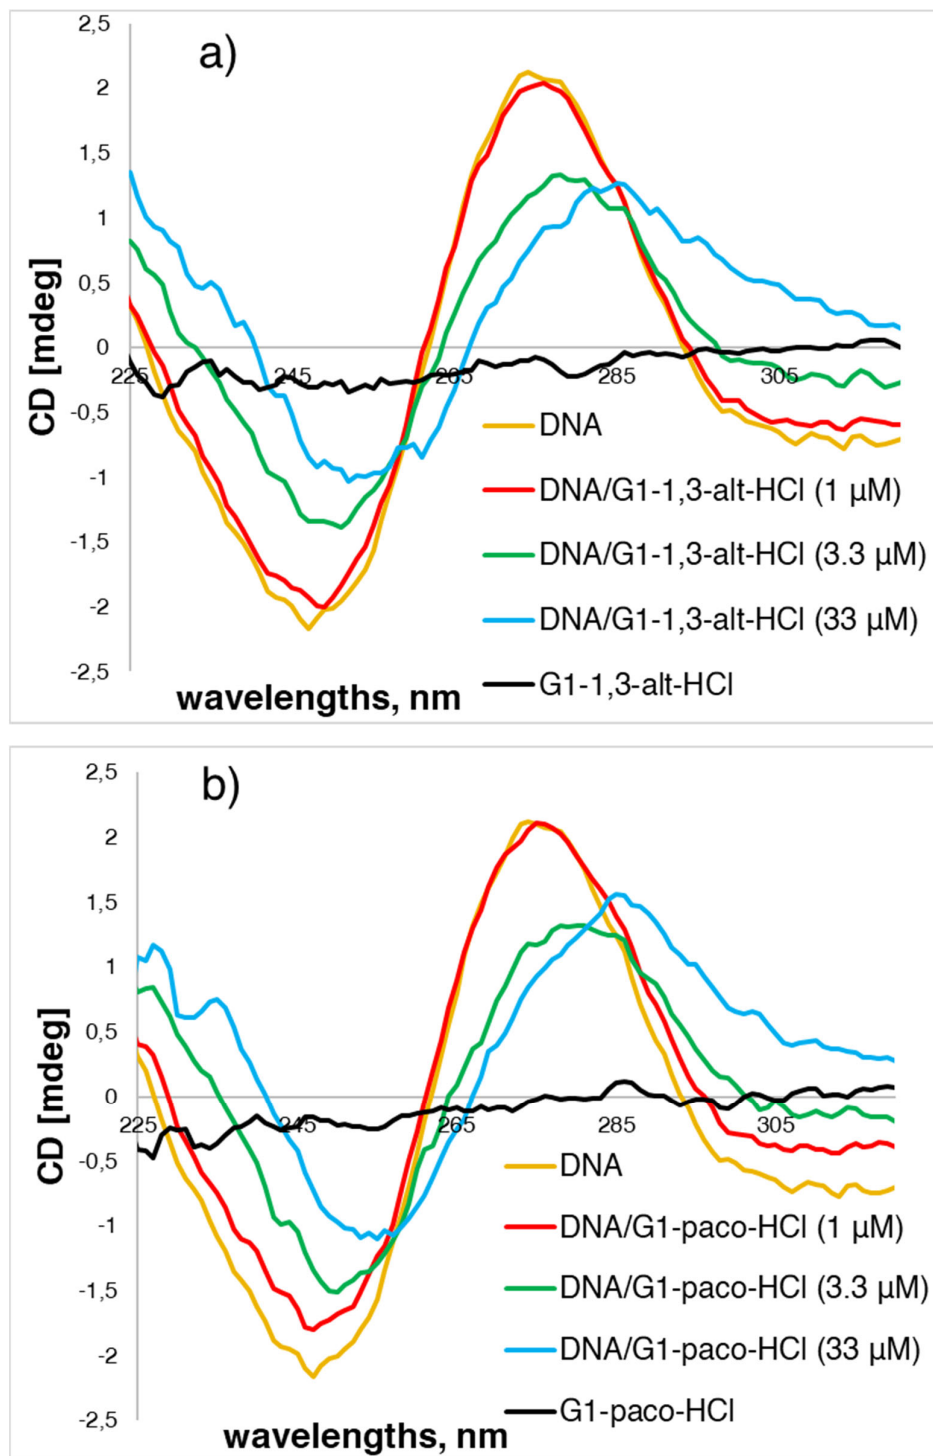

Fig. S38. CD spectra of salmon sperm DNA alone and in the presence of different concentrations of a) **G1-1,3-alt-HCl** and b) **G1-paco-HCl** in 10 mM Tris-HCl, pH 7.4.

## 2.4. DLS data

**Table S1. Size distributions (by intensity) of G1-HCl aggregates (10 mM Tris-HCl, pH 7.4).**

| Compound              | C (G1-HCl), $\mu$ M | d <sub>1</sub> , nm(%)                 | d <sub>2</sub> , nm(%)                 | d <sub>3</sub> , nm(%)                | PDI               |
|-----------------------|---------------------|----------------------------------------|----------------------------------------|---------------------------------------|-------------------|
| <b>G1-1,3-alt-HCl</b> | 500                 | 178.9 $\pm$ 46.2<br>(71.3 $\pm$ 16.7)  | 359.7 $\pm$ 315.6<br>(22.5 $\pm$ 17.9) | 843.1 $\pm$ 2056<br>(3.7 $\pm$ 3.1)   | 0.532 $\pm$ 0.087 |
|                       | 100                 | 316.6 $\pm$ 127.3<br>(70.2 $\pm$ 19.3) | 57.2 $\pm$ 59.1<br>(22.5 $\pm$ 17.6)   | 1823 $\pm$ 2818<br>(5.1 $\pm$ 2.0)    | 0.398 $\pm$ 0.053 |
|                       | 50                  | 269.0 $\pm$ 72.8<br>(83.7 $\pm$ 7.9)   | 34.0 $\pm$ 35.0<br>(9.6 $\pm$ 4.9)     | 1799 $\pm$ 2765<br>(3.9 $\pm$ 2.2)    | 0.386 $\pm$ 0.096 |
|                       | 10                  | 243.5 $\pm$ 52.5<br>(84.8 $\pm$ 9.7)   | 896.6 $\pm$ 2105.0<br>(10.8 $\pm$ 8.5) | 3519 $\pm$ 2723<br>(4.5 $\pm$ 2.4)    | 0.362 $\pm$ 0.048 |
|                       | 5                   | 260.8 $\pm$ 40.0<br>(71.3 $\pm$ 16.7)  | 4935 $\pm$ 82.6<br>(8.6 $\pm$ 1.1)     | 14.2 $\pm$ 21.9<br>(1.9 $\pm$ 3.0)    | 0.312 $\pm$ 0.025 |
| <b>G1-cone-HCl</b>    | 500                 | 6.9 $\pm$ 1.9<br>(45.8 $\pm$ 9.4)      | 119.1 $\pm$ 125.1<br>(26.7 $\pm$ 4.2)  | 149.3 $\pm$ 189.2<br>(18.1 $\pm$ 7.2) | 0.345 $\pm$ 0.104 |
|                       | 100                 | 78.7 $\pm$ 176.2<br>(47.5 $\pm$ 6.0)   | 288.7 $\pm$ 159.0<br>(39.4 $\pm$ 5.1)  | 1802 $\pm$ 2708<br>(9.7 $\pm$ 4.1)    | 0.412 $\pm$ 0.199 |
|                       | 50                  | 406.2 $\pm$ 136.4<br>(56.8 $\pm$ 7.4)  | 7.6 $\pm$ 2.0<br>(31.1 $\pm$ 9.6)      | 3376 $\pm$ 2612<br>(10.3 $\pm$ 2.6)   | 0.466 $\pm$ 0.188 |
|                       | 10                  | 226.7 $\pm$ 23.0<br>(65.7 $\pm$ 9.0)   | 825.0 $\pm$ 1988<br>(18.9 $\pm$ 5.2)   | 3325 $\pm$ 2570<br>(12.8 $\pm$ 3.7)   | 0.352 $\pm$ 0.063 |
|                       | 5                   | 206.3 $\pm$ 41.8<br>(65.5 $\pm$ 8.1)   | 849.0 $\pm$ 2035<br>(20.0 $\pm$ 4.6)   | 2502 $\pm$ 2728<br>(12.4 $\pm$ 3.4)   | 0.347 $\pm$ 0.141 |
| <b>G1-paco-HCl</b>    | 500                 | 378.1 $\pm$ 36.6<br>(63.4 $\pm$ 6.2)   | 2.2 $\pm$ 0.6<br>(26.7 $\pm$ 7.8)      | 931.2 $\pm$ 2268<br>(9.0 $\pm$ 4.0)   | 0.554 $\pm$ 0.147 |
|                       | 100                 | 439.1 $\pm$ 33.7<br>(64.2 $\pm$ 5.7)   | 3.3 $\pm$ 1.0<br>(19.1 $\pm$ 5.2)      | 27.1 $\pm$ 23.3<br>(10.8 $\pm$ 2.8)   | 0.626 $\pm$ 0.120 |
|                       | 50                  | 337.6 $\pm$ 53.4(87.8 $\pm$ 3.7)       | 2.9 $\pm$ 0.6<br>(11.9 $\pm$ 3.2)      | 926.7 $\pm$ 2270<br>(0.3 $\pm$ 0.7)   | 0.539 $\pm$ 0.064 |
|                       | 10                  | 337.8 $\pm$ 61.0<br>(82.8 $\pm$ 6.9)   | 30.4 $\pm$ 4.5<br>(14.7 $\pm$ 4.3)     | 2.6 $\pm$ 5.6<br>(2.5 $\pm$ 5.2)      | 0.699 $\pm$ 0.113 |
|                       | 5                   | 356.3 $\pm$ 101.6<br>(86.8 $\pm$ 1.9)  | 34.1 $\pm$ 2.9<br>(12.7 $\pm$ 2.3)     | 928.9 $\pm$ 2269<br>(0.6 $\pm$ 0.9)   | 0.550 $\pm$ 0.074 |



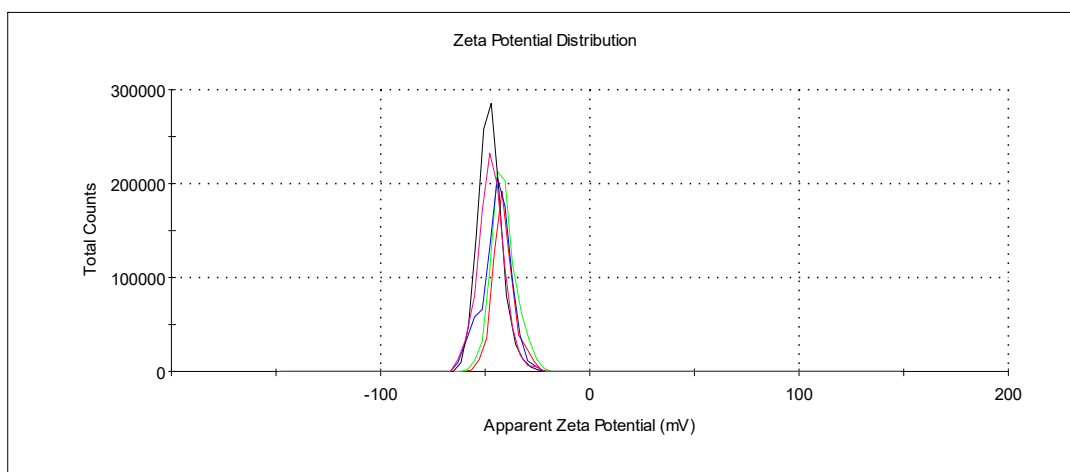

Fig. S39. Zeta-potential distributions of **G1-1,3-alt-HCl** (5  $\mu\text{M}$ ) + DNA ( $5.565 \times 10^{-5}$  M base pairs) aggregates.

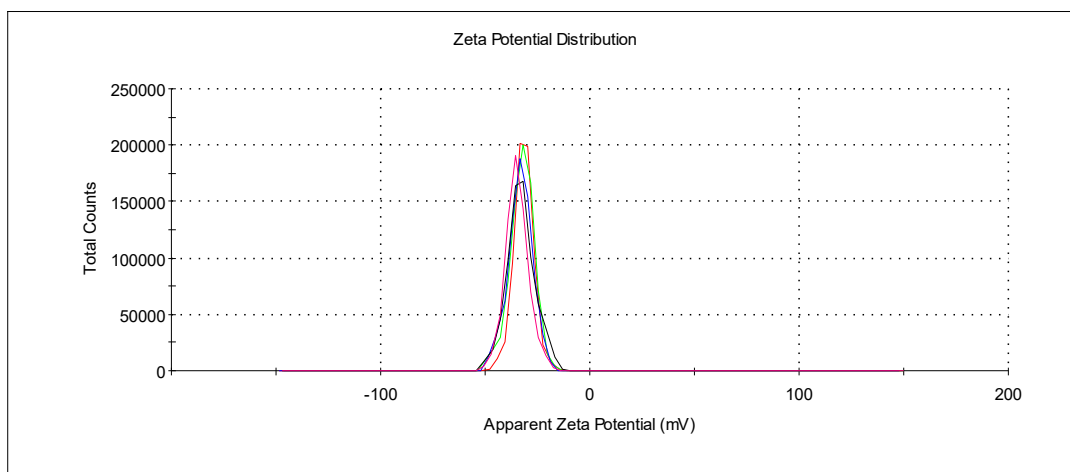

Fig. S40. Zeta-potential distributions of **G1-1,3-alt-HCl** (10  $\mu\text{M}$ ) + DNA ( $5.565 \times 10^{-5}$  M base pairs) aggregates.

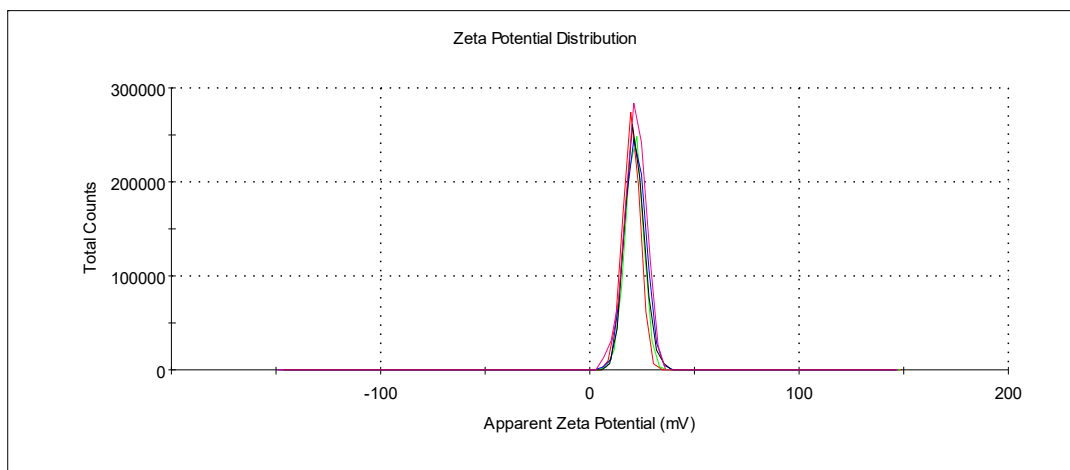

Fig. S41. Zeta-potential distributions of **G1-1,3-alt-HCl** (50  $\mu\text{M}$ ) + DNA ( $5.565 \times 10^{-5}$  M base pairs) aggregates.

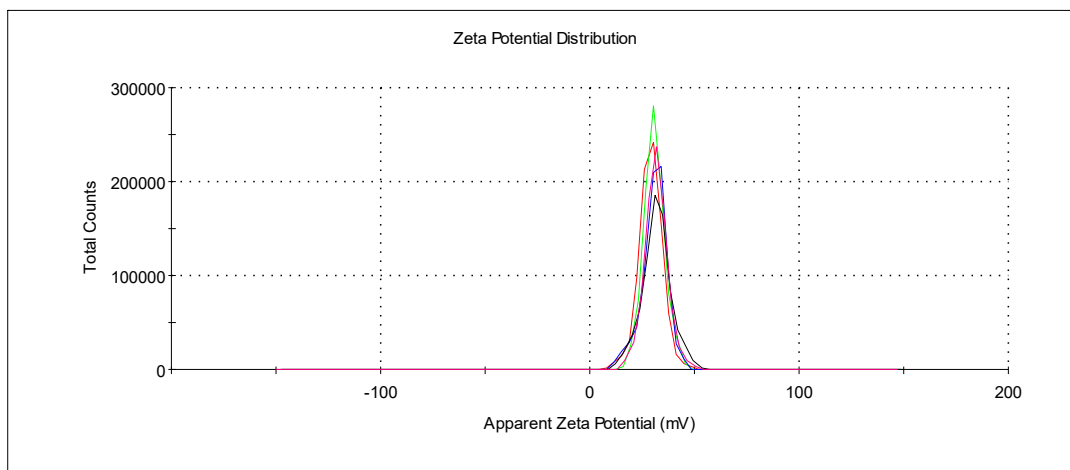

Fig. S42. Zeta-potential distributions of **G1-1,3-alt-HCl** (100 μM) + DNA ( $5.565 \times 10^{-5}$  M base pairs) aggregates.

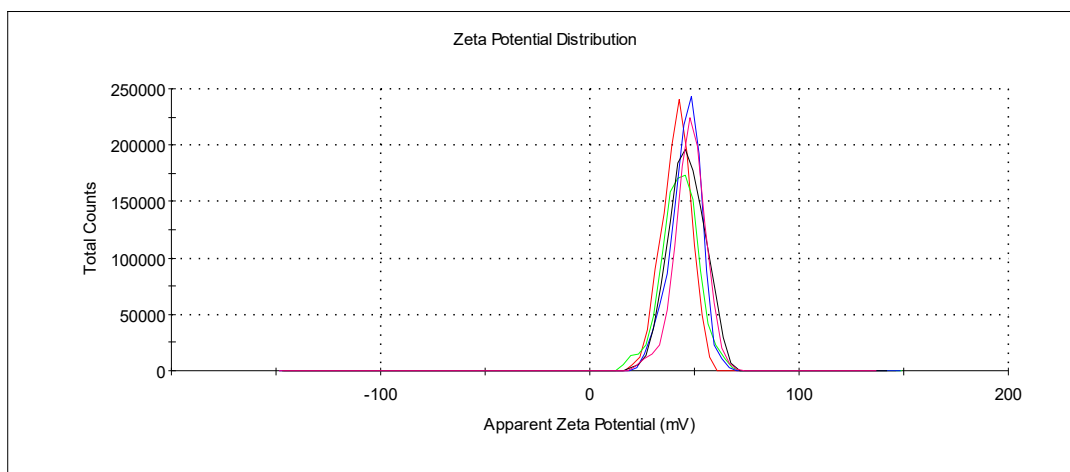

Fig. S43. Zeta-potential distributions of **G1-1,3-alt-HCl** (500 μM) + DNA ( $5.565 \times 10^{-5}$  M base pairs) aggregates.

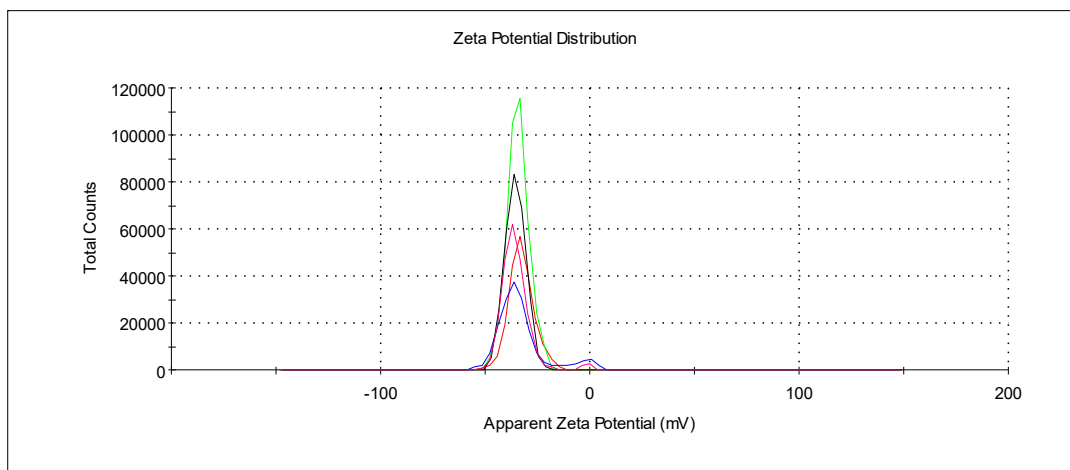

Fig. S44. Zeta-potential distributions of **G1-paco-HCl** (5 μM) + DNA ( $5.565 \times 10^{-5}$  M base pairs) aggregates.

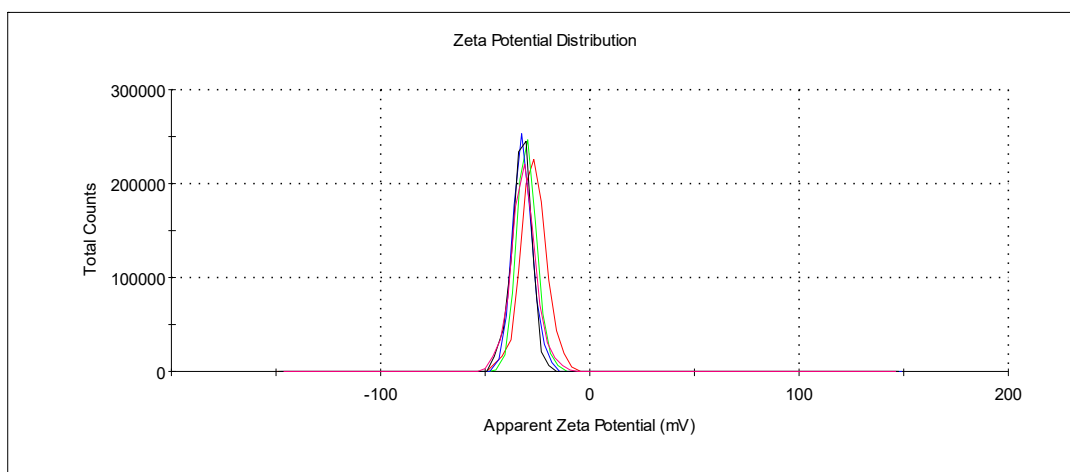

Fig. S45. Zeta-potential distributions of **G1-paco-HCl** (10 μM) + DNA (5.565×10<sup>-5</sup> M base pairs) aggregates.

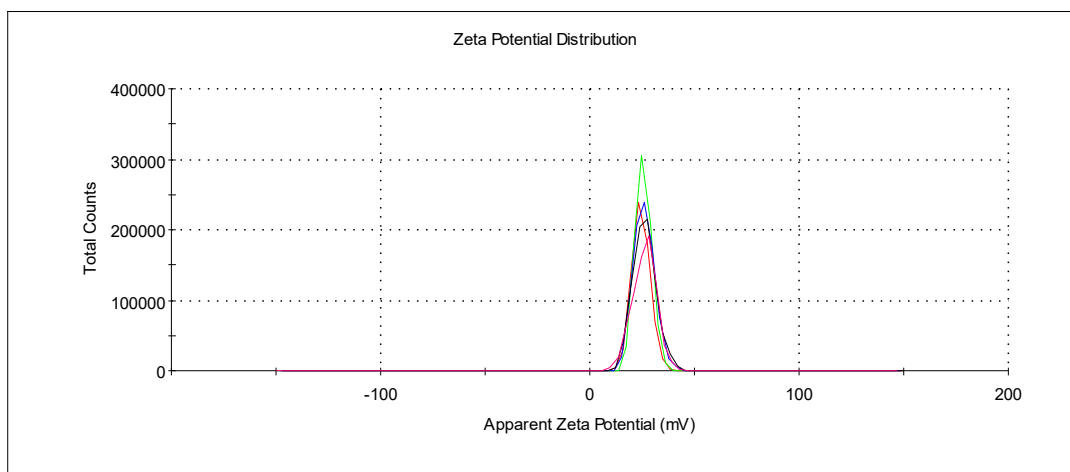

Fig. S46. Zeta-potential distributions of **G1-paco-HCl** (50 μM) + DNA (5.565×10<sup>-5</sup> M base pairs) aggregates.

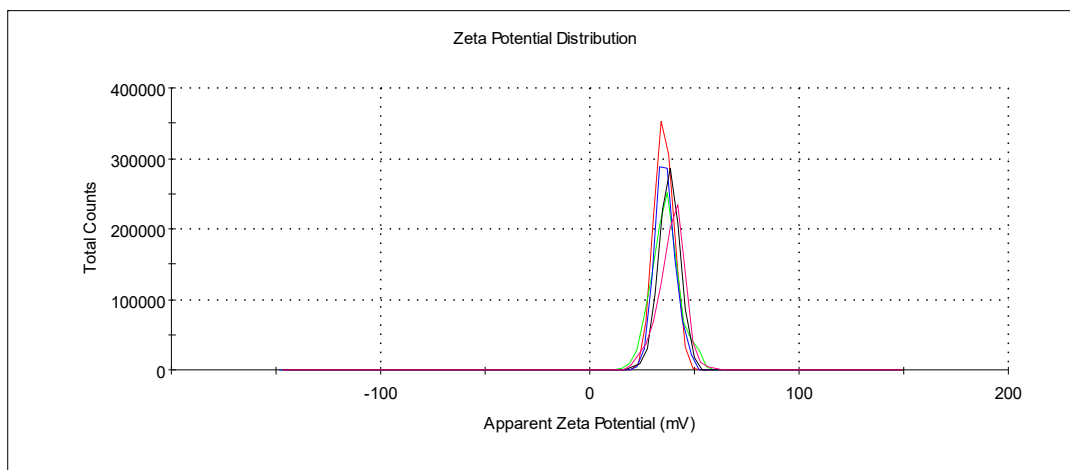

Fig. S47. Zeta-potential distributions of **G1-paco-HCl** (100 μM) + DNA (5.565×10<sup>-5</sup> M base pairs) aggregates.

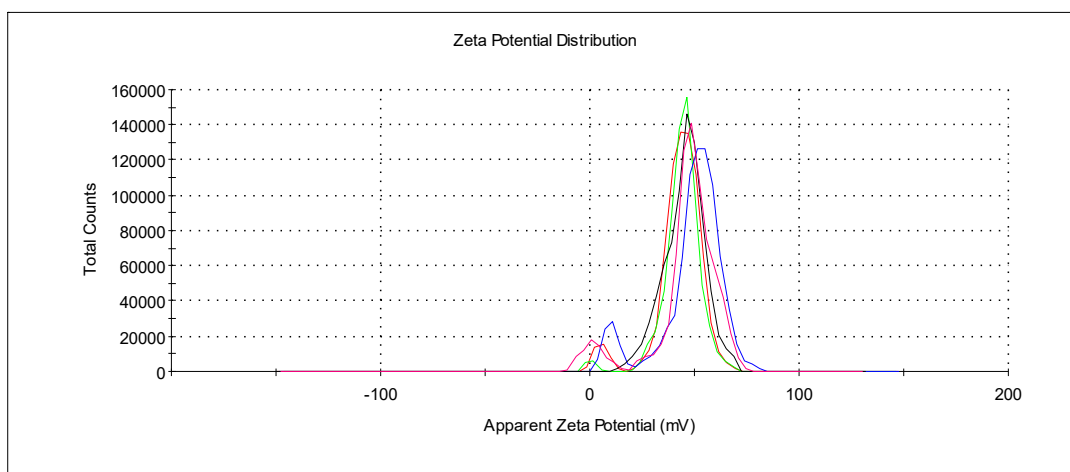

Fig. S48. Zeta-potential distributions of **G1-paco-HCl** (500  $\mu\text{M}$ ) + DNA ( $5.565 \times 10^{-5}$  M base pairs) aggregates.

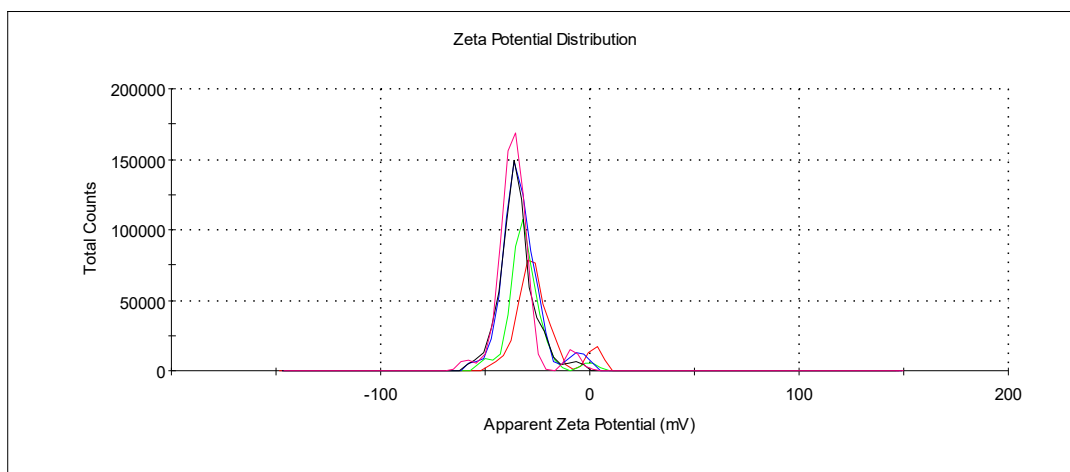

Fig. S49. Zeta-potential distributions of **G1-cone-HCl** (5  $\mu\text{M}$ ) + DNA ( $5.565 \times 10^{-5}$  M base pairs) aggregates.

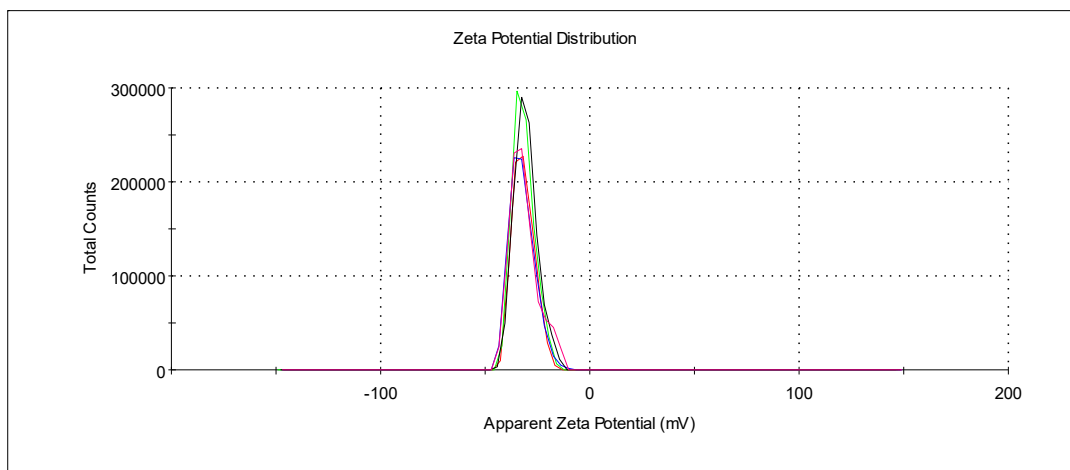

Fig. S50. Zeta-potential distributions of **G1-cone-HCl** (10  $\mu\text{M}$ ) + DNA ( $5.565 \times 10^{-5}$  M base pairs) aggregates.



Fig. S51. Zeta-potential distributions of **G1-cone-HCl** (50 μM) + DNA (5.565×10<sup>-5</sup> M base pairs) aggregates.

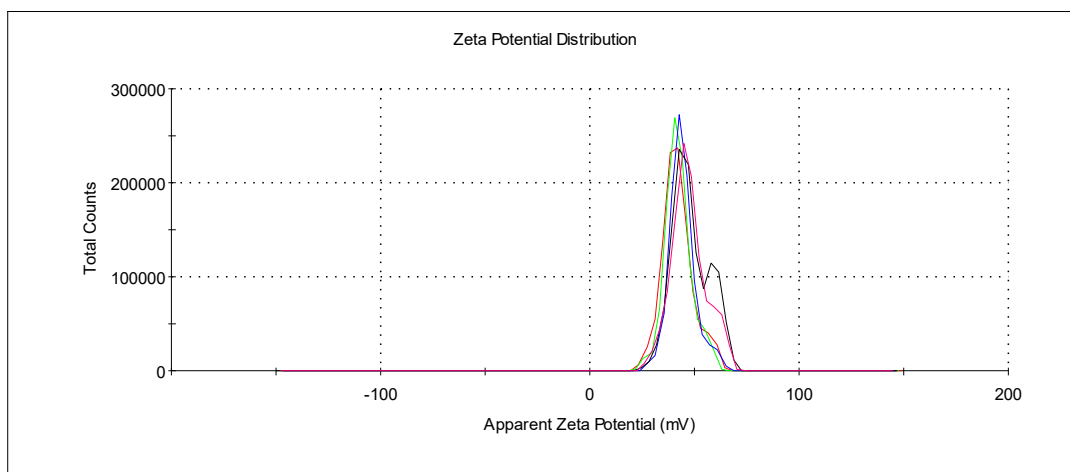

Fig. S52. Zeta-potential distributions of **G1-cone-HCl** (100 μM) + DNA (5.565×10<sup>-5</sup> M base pairs) aggregates.

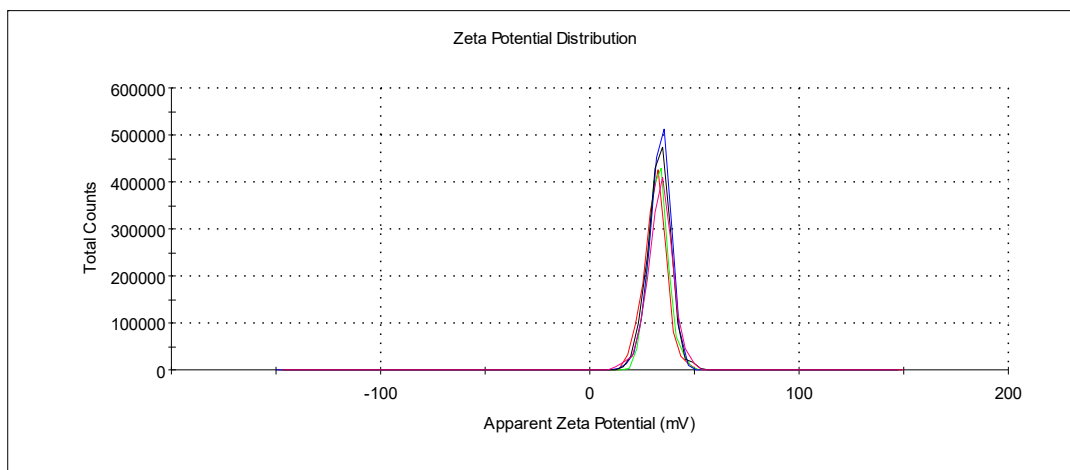

Fig. S53. Zeta-potential distributions of **G1-cone-HCl** (500 μM) + DNA (5.565×10<sup>-5</sup> M base pairs) aggregates.

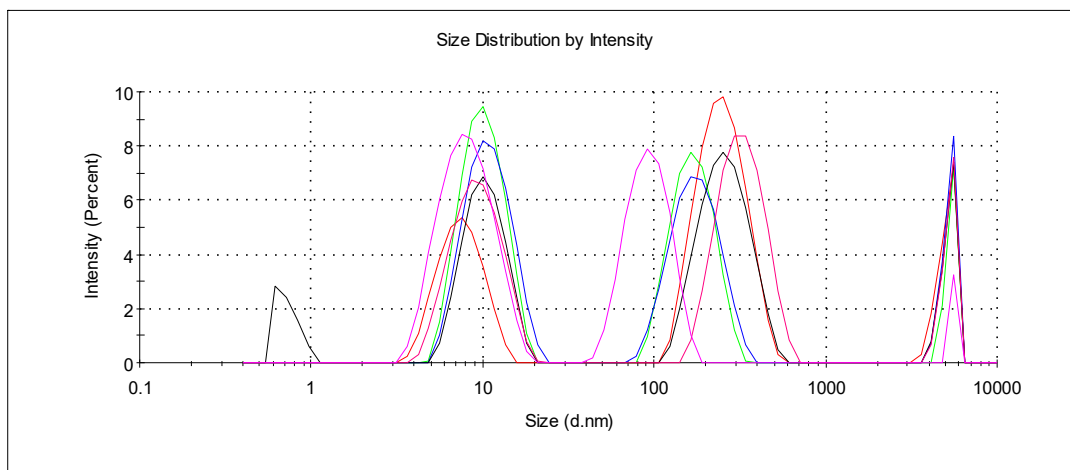

Fig. S54. Size distributions of DNA ( $5.565 \times 10^{-5}$  M base pairs).

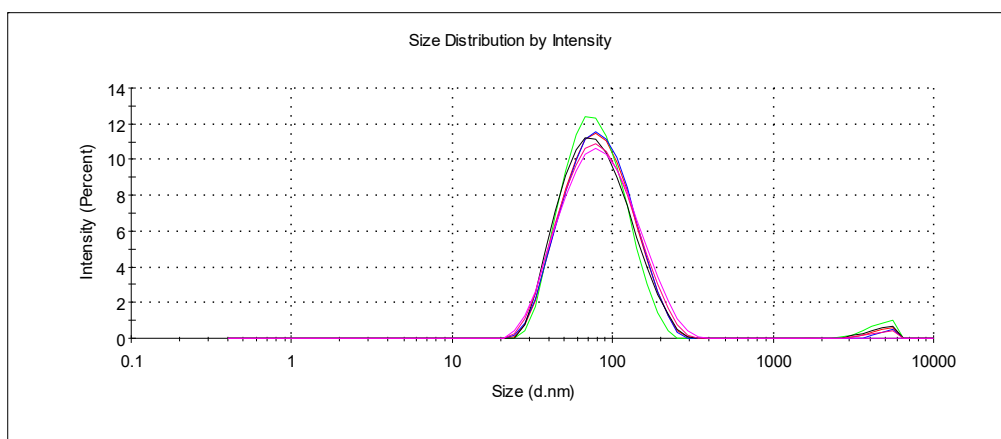

Fig. S55. Size distributions of **G1-1,3-alt-HCl** (500  $\mu\text{M}$ ) + DNA ( $5.565 \times 10^{-5}$  M base pairs) aggregates.

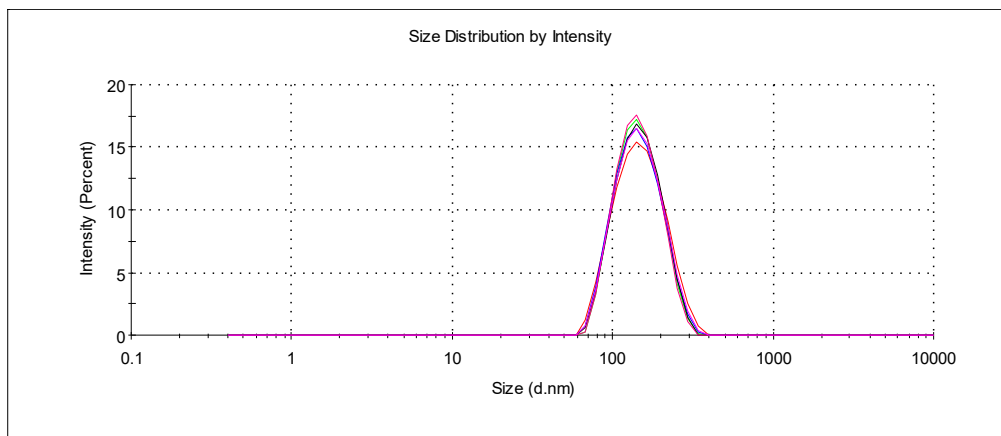

Fig. S56. Size distributions of **G1-1,3-alt-HCl** (100  $\mu\text{M}$ ) + DNA ( $5.565 \times 10^{-5}$  M base pairs) aggregates.

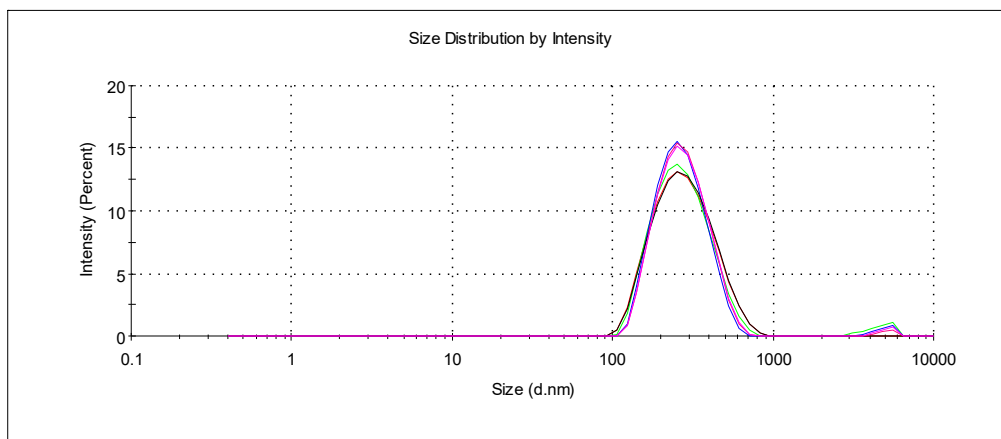

Fig. S57. Size distributions of **G1-1,3-alt-HCl** (50  $\mu\text{M}$ ) + DNA ( $5.565 \times 10^{-5}$  M base pairs) aggregates.

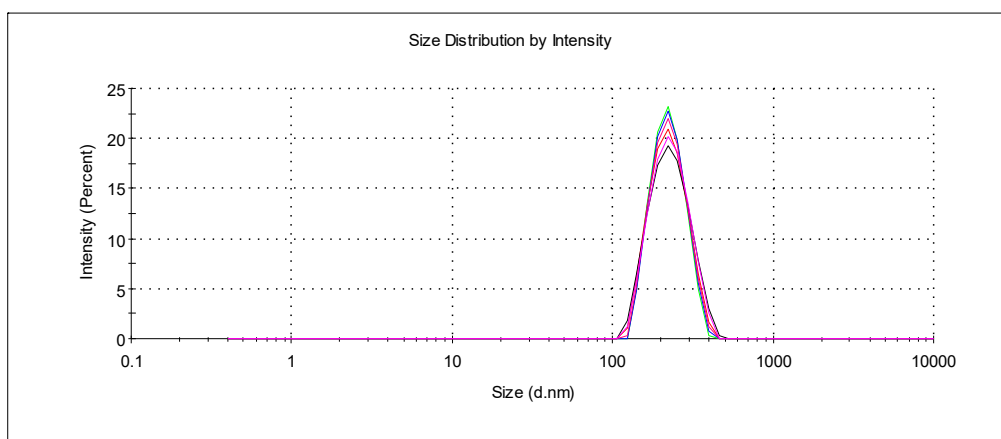

Fig. S58. Size distributions of **G1-1,3-alt-HCl** (10  $\mu\text{M}$ ) + DNA ( $5.565 \times 10^{-5}$  M base pairs) aggregates.

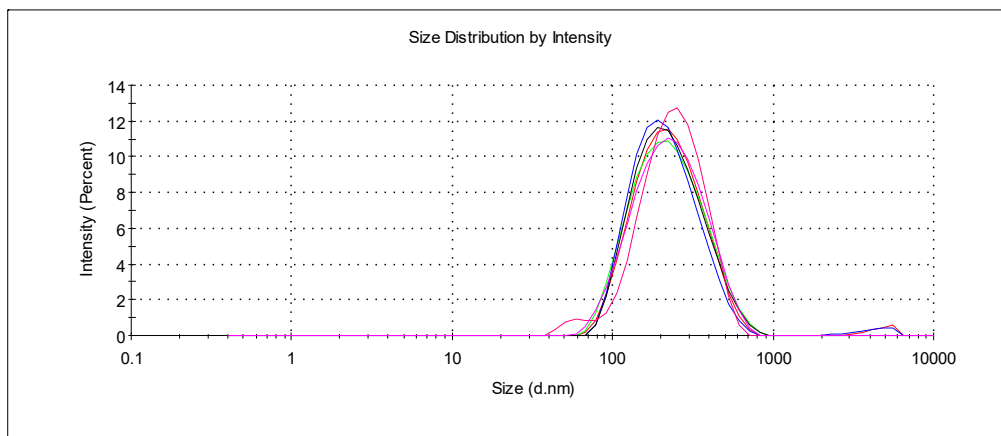

Fig. S59. Size distributions of **G1-1,3-alt-HCl** (5  $\mu\text{M}$ ) + DNA ( $5.565 \times 10^{-5}$  M base pairs) aggregates.

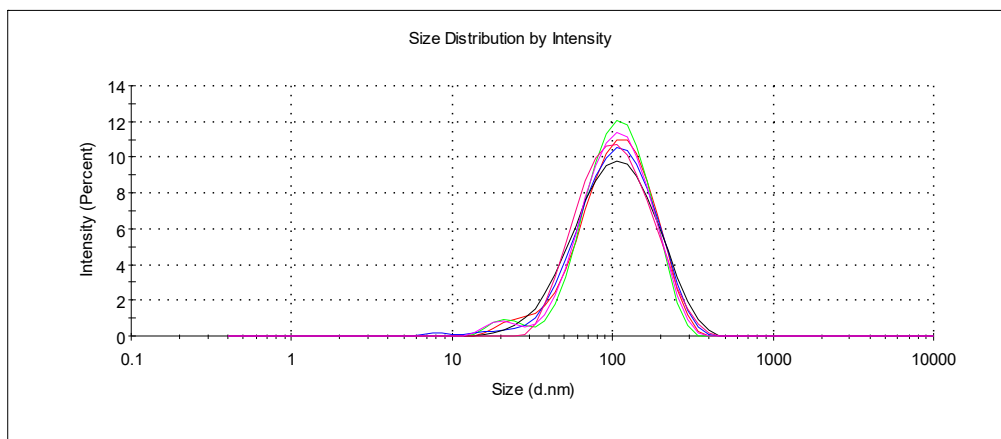

Fig. S60. Size distributions of **G1-cone-HCl** (500  $\mu\text{M}$ ) + DNA ( $5.565 \times 10^{-5}$  M base pairs) aggregates.

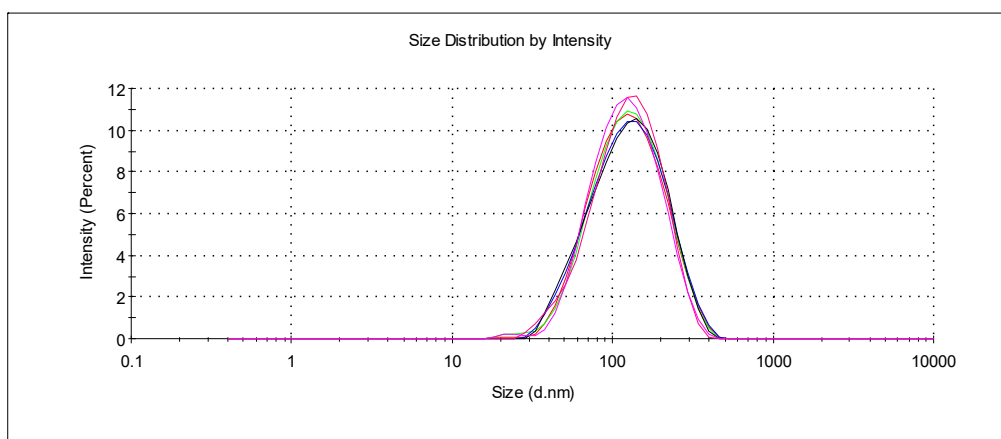

Fig. S61. Size distributions of **G1-cone-HCl** (100  $\mu\text{M}$ ) + DNA ( $5.565 \times 10^{-5}$  M base pairs) aggregates.

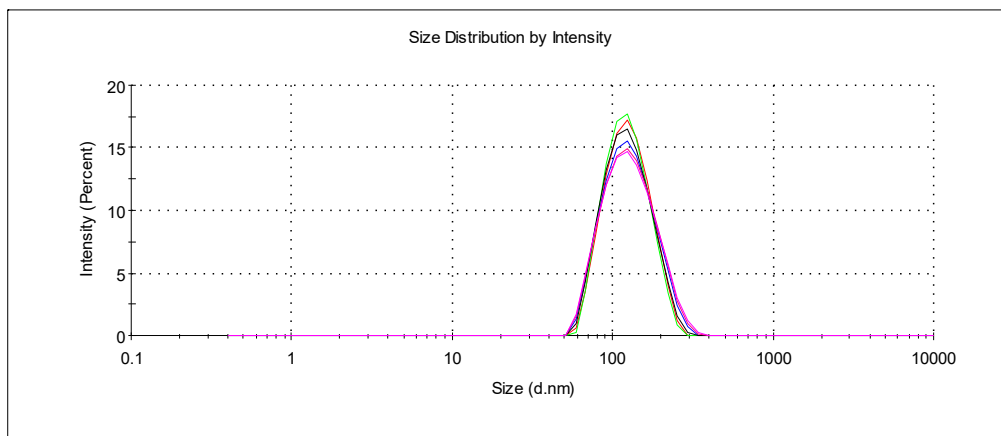

Fig. S62. Size distributions of **G1-cone-HCl** (50  $\mu\text{M}$ ) + DNA ( $5.565 \times 10^{-5}$  M base pairs) aggregates.



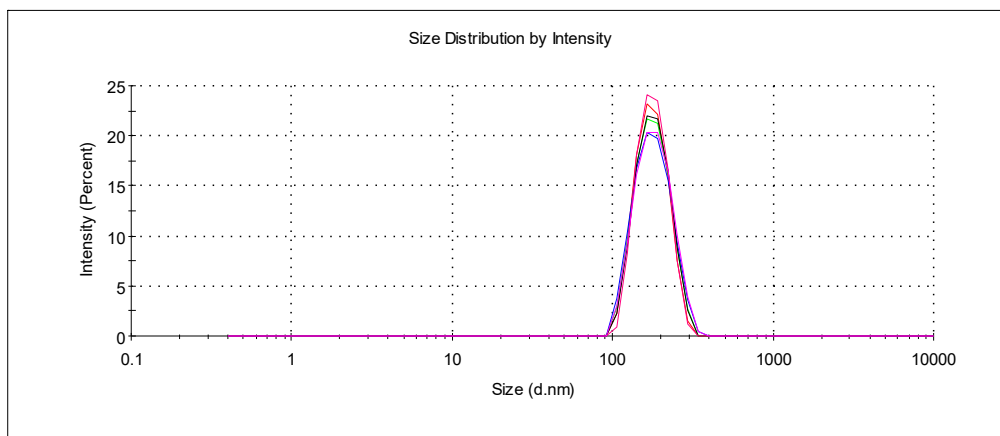

Fig. S63. Size distributions of **G1-cone-HCl** (10  $\mu\text{M}$ ) + DNA ( $5.565 \times 10^{-5}$  M base pairs) aggregates.

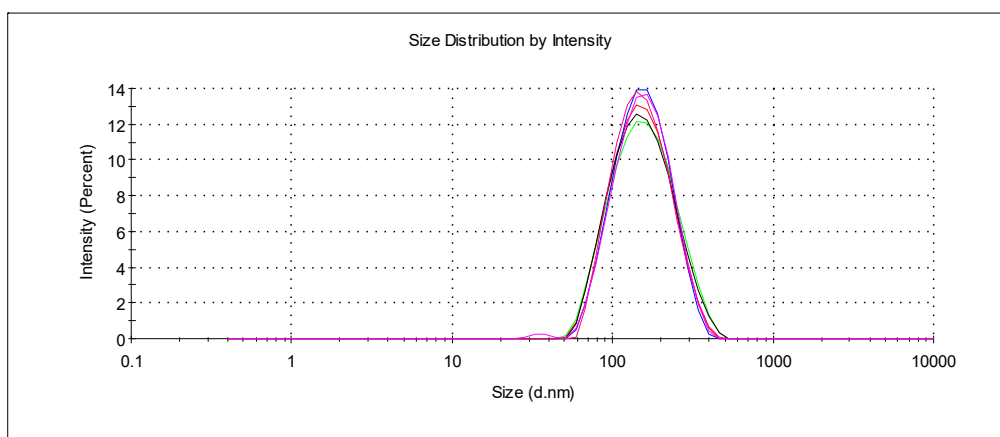

Fig. S64. Size distributions of **G1-cone-HCl** (5  $\mu\text{M}$ ) + DNA ( $5.565 \times 10^{-5}$  M base pairs) aggregates.

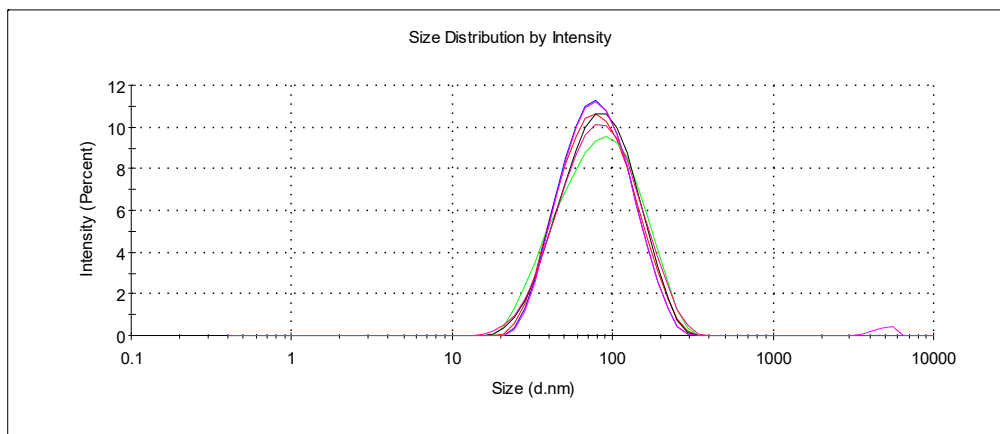

Fig. S65. Size distributions of **G1-paco-HCl** (500  $\mu\text{M}$ ) + DNA ( $5.565 \times 10^{-5}$  M base pairs) aggregates.

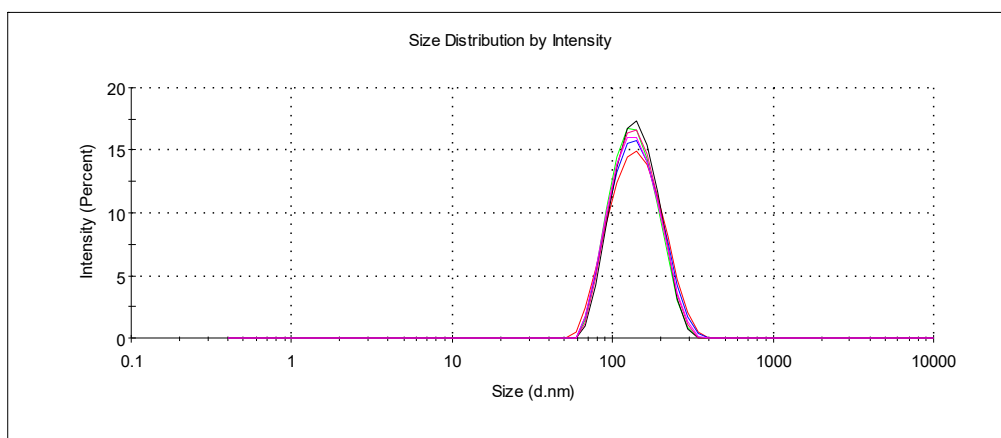

Fig. S66. Size distributions of **G1-paco-HCl** (100  $\mu\text{M}$ ) + DNA ( $5.565 \times 10^{-5}$  M base pairs) aggregates.

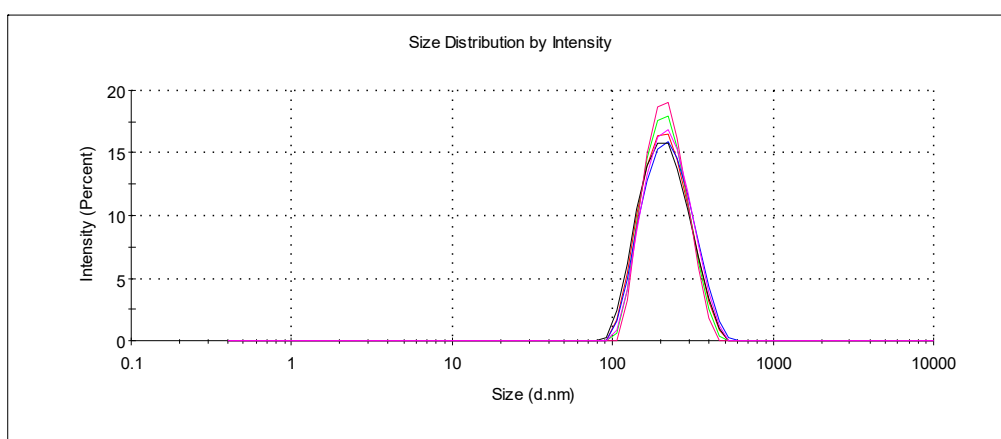

Fig. S67. Size distributions of **G1-paco-HCl** (50  $\mu\text{M}$ ) + DNA ( $5.565 \times 10^{-5}$  M base pairs) aggregates.

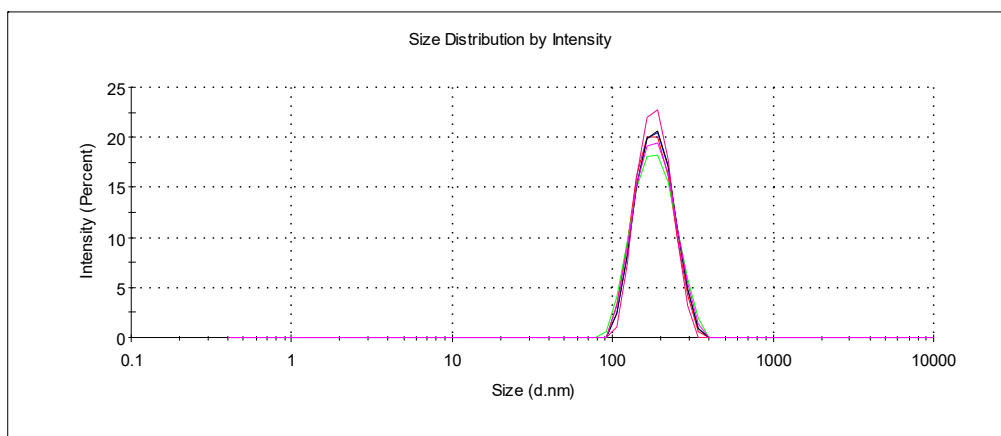

Fig. S68. Size distributions of **G1-paco-HCl** (10  $\mu\text{M}$ ) + DNA ( $5.565 \times 10^{-5}$  M base pairs) aggregates.

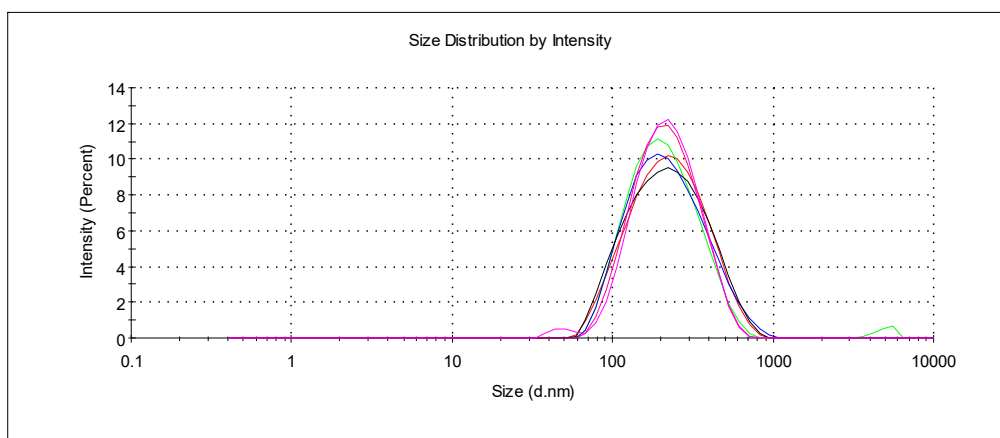

Fig. S69. Size distributions of **G1-paco-HCl** (5  $\mu\text{M}$ ) + DNA ( $5.565 \times 10^{-5}$  M base pairs) aggregates.

## 2.5. TEM images

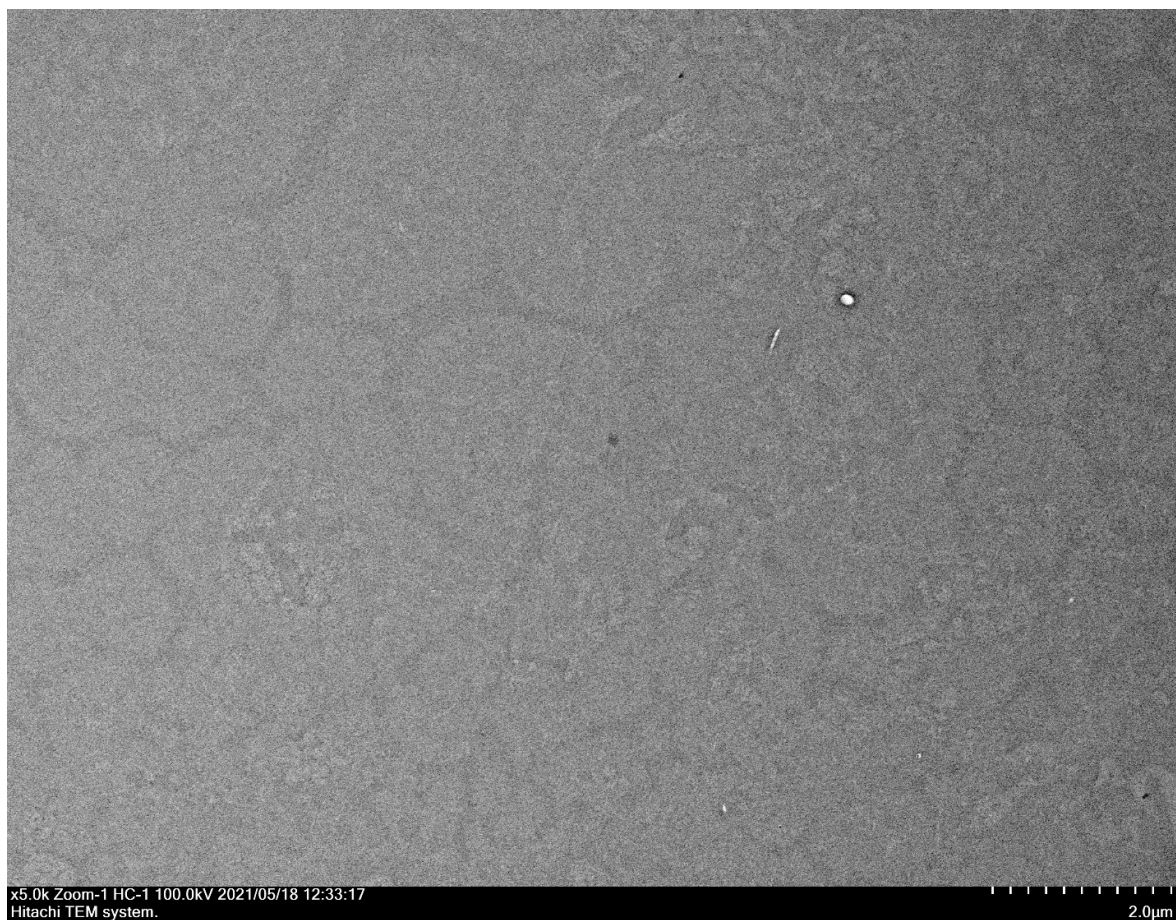

Fig. S70. TEM images of pure **G1-cone-HCl** ( $5 \times 10^{-5}$  M). Scale bar 2 μm.

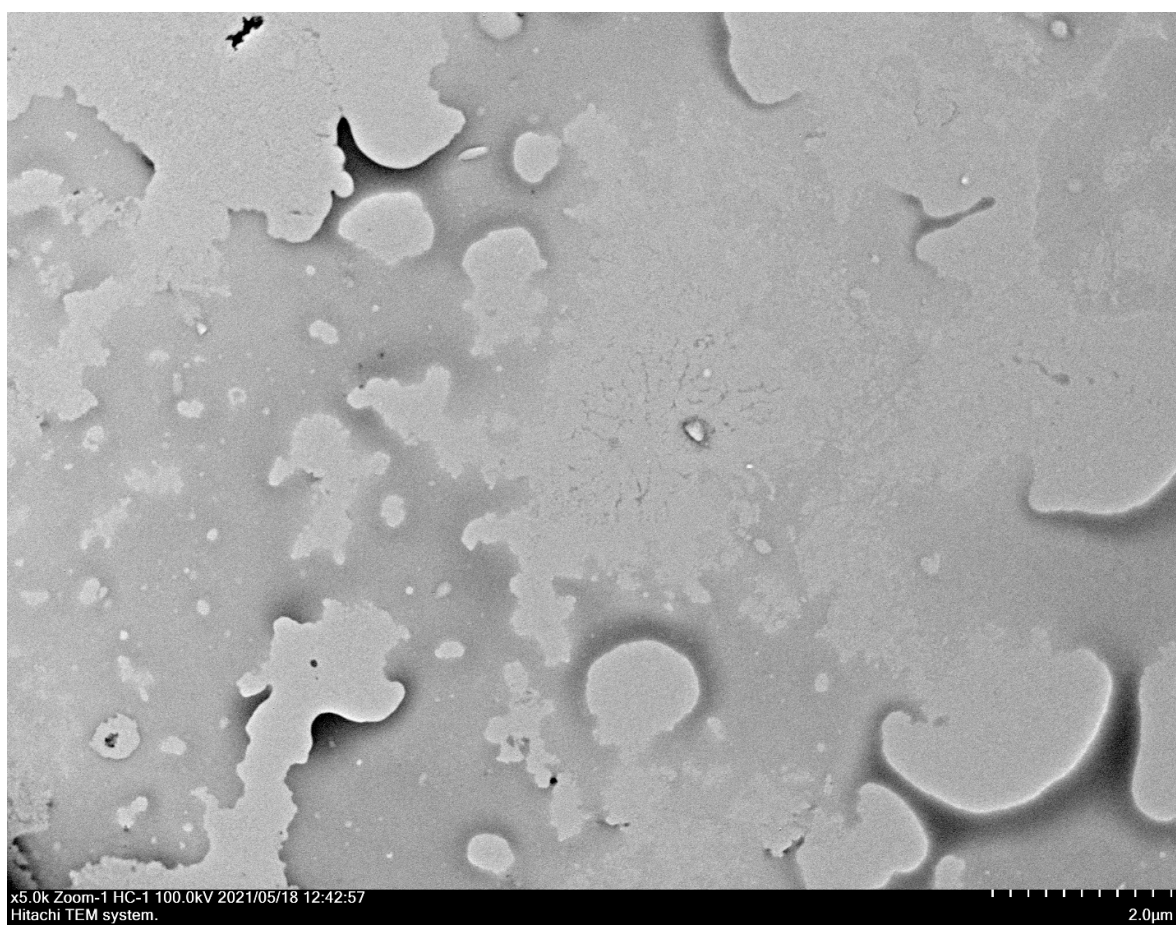

Fig. S71. TEM images of pure DNA ( $5.565 \times 10^{-5}$  M base pairs). Scale bar 2  $\mu\text{m}$ .
